# Supplementary material for: Candida haemulonii complex, an emerging threat from tropical regions?
Source: PubMed Central journal article supplement (PMC10437918; doi:10.1371/journal.pntd.0011453), 2023-07-31

# PLOS Neglected Tropical Diseases

## Candida haemulonii complex, an emerging threat from tropical regions?

--Manuscript Draft--

|                                                                                                                                                                                                                                                                                                                                                                                                                                    |                                                                                                                                                                                                                                                                                                                                                                                                                                                                                                                                                                                                                                                                                                                                                                                                                                                                                                                                                                                                                                                                                                                                                                                                                                                                                                                                                                                                                                                                                                                                                                                                                                                                                                                                                                                                                                                                                                                                                                               |
|------------------------------------------------------------------------------------------------------------------------------------------------------------------------------------------------------------------------------------------------------------------------------------------------------------------------------------------------------------------------------------------------------------------------------------|-------------------------------------------------------------------------------------------------------------------------------------------------------------------------------------------------------------------------------------------------------------------------------------------------------------------------------------------------------------------------------------------------------------------------------------------------------------------------------------------------------------------------------------------------------------------------------------------------------------------------------------------------------------------------------------------------------------------------------------------------------------------------------------------------------------------------------------------------------------------------------------------------------------------------------------------------------------------------------------------------------------------------------------------------------------------------------------------------------------------------------------------------------------------------------------------------------------------------------------------------------------------------------------------------------------------------------------------------------------------------------------------------------------------------------------------------------------------------------------------------------------------------------------------------------------------------------------------------------------------------------------------------------------------------------------------------------------------------------------------------------------------------------------------------------------------------------------------------------------------------------------------------------------------------------------------------------------------------------|
| <b>Manuscript Number:</b>                                                                                                                                                                                                                                                                                                                                                                                                          | PNTD-D-23-00339                                                                                                                                                                                                                                                                                                                                                                                                                                                                                                                                                                                                                                                                                                                                                                                                                                                                                                                                                                                                                                                                                                                                                                                                                                                                                                                                                                                                                                                                                                                                                                                                                                                                                                                                                                                                                                                                                                                                                               |
| <b>Full Title:</b>                                                                                                                                                                                                                                                                                                                                                                                                                 | Candida haemulonii complex, an emerging threat from tropical regions?                                                                                                                                                                                                                                                                                                                                                                                                                                                                                                                                                                                                                                                                                                                                                                                                                                                                                                                                                                                                                                                                                                                                                                                                                                                                                                                                                                                                                                                                                                                                                                                                                                                                                                                                                                                                                                                                                                         |
| <b>Short Title:</b>                                                                                                                                                                                                                                                                                                                                                                                                                | Emergence of the Candida haemulonii complex                                                                                                                                                                                                                                                                                                                                                                                                                                                                                                                                                                                                                                                                                                                                                                                                                                                                                                                                                                                                                                                                                                                                                                                                                                                                                                                                                                                                                                                                                                                                                                                                                                                                                                                                                                                                                                                                                                                                   |
| <b>Article Type:</b>                                                                                                                                                                                                                                                                                                                                                                                                               | Research Article                                                                                                                                                                                                                                                                                                                                                                                                                                                                                                                                                                                                                                                                                                                                                                                                                                                                                                                                                                                                                                                                                                                                                                                                                                                                                                                                                                                                                                                                                                                                                                                                                                                                                                                                                                                                                                                                                                                                                              |
| <b>Keywords:</b>                                                                                                                                                                                                                                                                                                                                                                                                                   | Invasive fungal infection; Candidemia; Emerging Infectious Disease; tropics; Candida haemulonii                                                                                                                                                                                                                                                                                                                                                                                                                                                                                                                                                                                                                                                                                                                                                                                                                                                                                                                                                                                                                                                                                                                                                                                                                                                                                                                                                                                                                                                                                                                                                                                                                                                                                                                                                                                                                                                                               |
| <b>Abstract:</b>                                                                                                                                                                                                                                                                                                                                                                                                                   | <p><b>Background</b><br/>Candida haemulonii complex-related species are pathogenic yeasts closely related to Candida auris with intrinsic antifungal resistance, but few epidemiological data are available.</p> <p><b>Methodology/Principal Findings</b><br/>We analyzed clinical and demographic characteristics of patients with fungemia due to C. haemulonii complex and related species (C. pseudohaemulonii, C. vulturna) reported in France during 2002-2021, and compared them to data of C. parapsilosis fungemia. We also conducted a study on adult inpatients and outpatients colonized by C. haemulonii complex, managed at the University Hospital of Martinique during 2014-2020. Finally, we performed a literature review of fungemia due to C. haemulonii complex and related species reported in Medline (1962-2022). In total, we identified 28 fungemia due to C. haemulonii complex in France. These episodes were frequently associated with bacterial infection (38%) and high mortality rate (44%), and differed from C. parapsilosis fungemia by their tropical origin, mainly from Caribbean and Latin America. All isolates showed decreased in vitro susceptibility to amphotericin B and fluconazole. In Martinique, we found that skin colonization was frequent in the community population, while colonization was strongly associated with the presence of foreign devices in ICU patients. The literature review identified 274 fungemia episodes, of which 56 were individually described. As in our national series, published cases originated mainly from tropical regions and exhibited high crude mortality.</p> <p><b>Conclusions/Significance</b><br/>Multidrug-resistant C. haemulonii complex-related species are responsible for fungemia and colonization in community and hospital settings, especially in tropical regions, warranting closer epidemiological surveillance to prevent a potential C. auris-like threat.</p> |
| <b>Additional Information:</b>                                                                                                                                                                                                                                                                                                                                                                                                     |                                                                                                                                                                                                                                                                                                                                                                                                                                                                                                                                                                                                                                                                                                                                                                                                                                                                                                                                                                                                                                                                                                                                                                                                                                                                                                                                                                                                                                                                                                                                                                                                                                                                                                                                                                                                                                                                                                                                                                               |
| <b>Question</b>                                                                                                                                                                                                                                                                                                                                                                                                                    | <b>Response</b>                                                                                                                                                                                                                                                                                                                                                                                                                                                                                                                                                                                                                                                                                                                                                                                                                                                                                                                                                                                                                                                                                                                                                                                                                                                                                                                                                                                                                                                                                                                                                                                                                                                                                                                                                                                                                                                                                                                                                               |
| <p><b>Government Employee</b></p> <p>Are you or any of the contributing authors an employee of the United States government?</p> <p>Manuscripts authored by one or more US Government employees are not copyrighted, but are licensed under a <a href="#">CC0 Public Domain Dedication</a>, which allows unlimited distribution and reuse of the article for any lawful purpose. This is a legal requirement for US Government</p> | <p>No - No authors are employees of the U.S. government.</p>                                                                                                                                                                                                                                                                                                                                                                                                                                                                                                                                                                                                                                                                                                                                                                                                                                                                                                                                                                                                                                                                                                                                                                                                                                                                                                                                                                                                                                                                                                                                                                                                                                                                                                                                                                                                                                                                                                                  |

|                                                                                                                                                                                                                                                                                                                                                                                                                                                                                                 |                                                                                                                                                                                                                                                                                                                                                                                                                                                                                                                                                                                                                                                                                                                                                                                                                                                                                                                      |
|-------------------------------------------------------------------------------------------------------------------------------------------------------------------------------------------------------------------------------------------------------------------------------------------------------------------------------------------------------------------------------------------------------------------------------------------------------------------------------------------------|----------------------------------------------------------------------------------------------------------------------------------------------------------------------------------------------------------------------------------------------------------------------------------------------------------------------------------------------------------------------------------------------------------------------------------------------------------------------------------------------------------------------------------------------------------------------------------------------------------------------------------------------------------------------------------------------------------------------------------------------------------------------------------------------------------------------------------------------------------------------------------------------------------------------|
| <p>employees.</p> <p>This will be typeset if the manuscript is accepted for publication.</p>                                                                                                                                                                                                                                                                                                                                                                                                    |                                                                                                                                                                                                                                                                                                                                                                                                                                                                                                                                                                                                                                                                                                                                                                                                                                                                                                                      |
| <p><b>Financial Disclosure</b></p> <p>Enter a financial disclosure statement that describes the sources of funding for the work included in this submission and the role the funder(s) played. This includes grants and any commercial funding of the work or authors.</p> <p>This statement will be typeset if the manuscript is accepted for publication.</p> <p>Review the <a href="#">submission guidelines</a> and the instructions link below for detailed requirements and guidance.</p> | <p>This work was supported by Santé Publique France and Institut Pasteur. The funders had no role in study design, data collection, analysis, or interpretation of data.</p>                                                                                                                                                                                                                                                                                                                                                                                                                                                                                                                                                                                                                                                                                                                                         |
| <p><b>Competing Interests</b></p> <p>On behalf of all authors, disclose any competing interests that could be perceived to bias this work.</p> <p>This statement will be typeset if the manuscript is accepted for publication.</p> <p>Review the instructions link below and PLOS NTDs' <a href="#">competing interests</a> policy to determine what information must be disclosed at submission.</p>                                                                                          | <p>We declare no conflict of interest.</p>                                                                                                                                                                                                                                                                                                                                                                                                                                                                                                                                                                                                                                                                                                                                                                                                                                                                           |
| <p><b>Data Availability</b></p> <p>Provide a <b>Data Availability Statement</b> in the box below. This statement should detail where the data used in this submission can be accessed. This statement will be typeset if the manuscript is accepted for publication.</p> <p>Before publication, authors are required to</p>                                                                                                                                                                     | <p>For data from the RESSIF and YEASTS networks</p> <p>The data used for this publication are considered as pseudonymized personal data. As such the GDPR as well as the French Law pertaining data protection apply to the use of this dataset. For data access request, a requester can contact: Pr Olivier Lortholary, corresponding author. The requester shall be informed that access to and reuse of this dataset will require the obtention of (i) an authorization from the French Supervisory Authority regarding data protection (the CNIL) and (ii) an ethics opinion from the competent French ethics committee (the CESREES)</p> <p>For data from the University Hospital of Martinique</p> <p>Access to the data of the University Hospital of Martinique can be requested from the institution's Data Protection Officer (DPO): <a href="mailto:dpo@chu-martinique.fr">dpo@chu-martinique.fr</a></p> |

make all data underlying their findings fully available, without restriction. Review our [PLOS Data Policy](#) page for detailed information on this policy. Instructions for writing your Data Availability statement can be accessed via the Instructions link below.

# ***Candida haemulonii* complex, an emerging threat from tropical regions?**

Ugo Françoise<sup>1#a</sup>, Marie Desnos-Ollivier<sup>2</sup>, Yohann Le Govic<sup>1#b</sup>, Karine Sitbon<sup>2</sup>, Ruddy Valentino<sup>3</sup>, Sandrine Peugny<sup>4</sup>, Taieb Chouaki<sup>5</sup>, Edith Mazars<sup>6</sup>, André Paugam<sup>7</sup>, Muriel Nicolas<sup>8</sup>, Nicole Desbois-Nogard<sup>1¶</sup> and Olivier Lortholary<sup>2,9,10\*¶</sup>, French Mycoses Study Group<sup>^</sup>

<sup>1</sup> Laboratoire de Parasitologie-Mycologie, Centre Hospitalier Universitaire de Martinique, Fort-de-France, Martinique, France

<sup>2</sup> Institut Pasteur, Université de Paris Cité, Centre National de Référence des Mycoses invasives et Antifongiques, Paris, France

<sup>3</sup> Service de réanimation, Centre Hospitalier Universitaire de Martinique, Fort-de-France, Martinique, France

<sup>4</sup> Unité de Maladies Infectieuses et Tropicales, Centre Hospitalier de Cayenne, Cayenne, Guyane Française, France

<sup>5</sup> Laboratoire de Parasitologie-Mycologie, Centre Hospitalier Universitaire Amiens-Picardie, Amiens, France

<sup>6</sup> Laboratoire de Parasitologie-Mycologie, Centre Hospitalier de Valenciennes, Valenciennes, France

<sup>7</sup> Laboratoire de Parasitologie-Mycologie, Centre Hospitalier Universitaire Cochin, Assistance Publique-Hôpitaux de Paris, Paris, France

<sup>8</sup> Laboratoire de Parasitologie-Mycologie, Centre Hospitalier Universitaire de Guadeloupe, Pointe-à-Pitre, Guadeloupe, France

<sup>9</sup> Institut Imagine, Paris, France.

<sup>10</sup> Université de Paris Cité, Hôpital Universitaire Necker-Enfants Malades, Assistance Publique-Hôpitaux de Paris, Paris, France

<sup>#a</sup>Present address: Unité de Maladies Infectieuses et Tropicales, Centre Hospitalier de Cayenne, Cayenne, Guyane Française, France

24 #<sup>b</sup>Present address: Laboratoire de Parasitologie-Mycologie, Centre Hospitalier Universitaire Amiens-Picardie,  
25 Amiens, France

26 \*Corresponding author: [olivier.lortholary@wanadoo.fr](mailto:olivier.lortholary@wanadoo.fr) (OL)

27 <sup>¶</sup>These authors contributed equally to this article.

28 <sup>^</sup>Study Group team members are listed in the Acknowledgments

29

30 **Short title:** Emergence of the *C. haemulonii* complex in tropical regions

31 **Keywords:** Invasive fungal infection, Candidemia, Emerging Infectious Disease, tropics, *C. haemulonii* 

## 32 **Abstract**

### 33 **Background**

34 *Candida haemulonii* complex-related species are pathogenic yeasts closely related to *Candida auris* with  
35 intrinsic antifungal resistance, but few epidemiological data are available.

### 36 **Methodology/Principal Findings**

37 We analyzed clinical and demographic characteristics of patients with fungemia due to *C. haemulonii* complex  
38 and related species (*C. pseudohaemulonii*, *C. vulturna*) reported in France during 2002-2021, and compared  
39 them to data of  *parapsilosis* fungemia. We also conducted a study on adult inpatients and outpatients  
40 colonized by *C. haemulonii* complex, managed at the University Hospital of Martinique during 2014-2020.  
41 Finally, we performed a literature review of fungemia due to *C. haemulonii* complex and related species  
42 reported in Medline (1962-2022).

43 In total, we identified 28 fungemia due to *C. haemulonii* complex in France. These episodes were frequently  
44 associated with bacterial infection (38%) and high mortality rate (44%), and differed from *C. parapsilosis*  
45 fungemia by their tropical origin, mainly from Caribbean and Latin America. All isolates showed decreased  
46 *in vitro* susceptibility to amphotericin B and fluconazole. In Martinique, we found that skin colonization was  
47 frequent in the community population, while colonization was strongly associated with the presence of foreign  
48 devices in ICU patients. The literature review identified 274 fungemia episodes, of which 56 were individually  
49 described. As in our national series, published cases originated mainly from tropical regions and exhibited  
50 high crude mortality.

### 51 **Conclusions/Significance**

52 Multidrug-resistant *C. haemulonii* complex-related species are responsible for fungemia and colonization in  
53 community and hospital settings, especially in tropical regions, warranting closer epidemiological surveillance  
54 to prevent a potential *C. auris*-like threat.

## 55 **Author Summary**

56 Yeasts of the *C. haemulonii* complex (*C. haemulonii sensu stricto*, *C. duobushaemulonii*, *C. haemulonii var.*  
57 *vulnera*) and related species (*C. pseudohaemulonii* and *C. vulturna*), are phylogenetically close to *Candida*  
58 *auris*, but their distribution, pathophysiology and antifungal resistance profiles are poorly known. This work  
59 provides the first epidemiological data on these yeasts in France. Fungemia caused by these yeasts were mainly  
60 identified in tropical overseas regions (French West Indies, French Guiana), and occurred in patients with risk  
61 factors for candidemia, particularly a cutaneous portal of entry. This work highlights the skin carriage of these  
62 yeasts in these tropical regions, and their ability to colonize foreign devices. Like for *Candida parapsilosis*,  
63 catheters are the main portal of entry for fungemia but mortality seems higher with yeasts of the *C. haemulonii*  
64 complex and related. They commonly show *in vitro* resistance to many antifungal agents, notably fluconazole  
65 and amphotericin B, which are still frequently used as first and second-line treatments for candidemia  
66 worldwide. The findings from the literature review are consistent with these overall results. These  
67 observations justify closer epidemiological surveillance in the concerned regions to prevent a potential *C.*  
68 *auris*-like threat.

## 69 Introduction

70 Since the 2010s[1], multidrug-resistant *Candida auris*[2], with its ability to survive on prosthetic materials  
71 and spread among patients, has become a spreading healthcare-associated fungus[3–5]. Within the  
72 *Metschnikowiaceae* clade, yeasts of the *Candida haemulonii* complex (*C. haemulonii sensu stricto*, *C.*  
73 *haemulonii var. vulnera*, and *C. duobushaemulonii*), *C. pseudohaemulonii*, and *C. vulturna* are  
74 phylogenetically closely related to *C. auris* and share several pathogenicity-related traits, like adhesion on  
75 prosthetic materials[6,7] phenotypic switching[8], and multidrug resistance[7,9–11]. Few cases of *C.*  
76 *haemulonii* complex infection have been reported since its description[12,13], but since the 2000s, several  
77 fungemia have been reported, especially in tropical areas[10,14–16]. These yeasts present often high MICs  
78 for fluconazole[17], the first-line antifungal for treating fungemia in many low-income countries, and exhibit  
79 a decreased susceptibility to amphotericin B, often used as salvage therapy. Isolates of this complex are usually  
80 susceptible to echinocandins, although echinocandin-resistant strains have been isolated from human  
81 samples[18].

82 In France, rare yeasts are responsible for nearly 7.4% of fungemia[19] but there are no major epidemiological  
83 studies focused on this complex. Consequently, risk factors, portal of entry management and clinical outcome  
84 of fungemia due to *Candida haemulonii* complex-related species remain largely unknown[20].

85 In this context, we carried out a study in mainland France and French overseas territories including (i)  
86 epidemiology of fungemia caused by *C. haemulonii* complex, *C. pseudohaemulonii* and *C. vulturna*  
87 (hereinafter referred to as “fungemia series”), (ii) a case-control study comparing these fungemia to those due  
88 to *C. parapsilosis*, a skin commensal, and (iii) a study of colonization in outpatients and inpatients admitted  
89 to intensive care units (ICU) in Martinique. Finally, we conducted a literature review on fungemia caused by  
90 these species during the past six decades.



## 91 **Methods**

### 92 **Epidemiology of fungemia in France**

93 We collected clinical data related to fungemia caused by *C. haemulonii* complex, *C. pseudohaemulonii* and  
94 *C. vulturna* from two French databases, from their creation until 31<sup>st</sup> July 2021. Both programs were launched  
95 by the French National Reference Centre for Invasive Mycoses & Antifungals (NRCMA): the YEASTS  
96 surveillance program, initiated in 2002 with the participation of 27 university or cancer hospitals in the Paris  
97 area[21] and the French Surveillance Network of Invasive Fungal Infections (RESSIF) program, initiated in  
98 2012 with the participation of 29 hospitals from mainland France and overseas [19].

### 99 **Case-control study**

100 The above-described series constitutes the case population. We chose fungemia caused by *C. parapsilosis* from  
101 the RESSIF database as the control population, rather than *C. albicans* because preliminary information  
102 revealed the presence of these study species on human skin.

### 103 **Colonization in Martinique**

104 We enrolled patients with a peripheral-blood sample containing *C. haemulonii* complex yeasts at the Martinique  
105 University hospital, between April 2014 and August 2020. We retained cases involving adult patients with  
106 putative community-acquired colonization (referred to as “outpatients”, including those hospitalized <48h) or  
107 hospitalized in ICU. Lack of pathogenicity was retained by the clinician according to clinical context and  
108 source of sampling.

## 109 **Literature review**

110 We performed a literature review on Medline database, from January 1<sup>st</sup>, 1962 to September 1<sup>st</sup>, 2022 with  
111 the following search terms in all fields: “*Candida haemulonii*” OR “*Torulopsis haemulonii*” OR “*Candida*  
112 *duobushaemulonii*” OR “*Candida pseudohaemulonii*” OR “*Candida vulturna*”. We included all reported cases  
113 of *C. haemulonii* complex, *C. pseudohaemulonii*, and *C. vulturna* fungemia identified by sequencing, for  
114 which individual clinical information and/or susceptibility to antifungals were available.

## 115 **Isolate characterization**

### 116 **Fungemia series**

117 All bloodstream isolates of *C. haemulonii* complex and related species were identified at the NRCMA by  
118 sequencing of ITS1–5.8S–ITS2 and D1/D2 regions of the ribosomal DNA, using V9D/LS266 and NL1/NL4  
119 primers as previously described[22]. Antifungal susceptibility testing to micafungin, amphotericin B, and  
120 fluconazole, was performed using the broth microdilution method published by EUCAST (v 7.3.2 valid from  
121 22 April, 2020), with a modification for micafungin medium as previously described[23].

### 122 **Colonization in Martinique**

123 From 2014 to 2017, yeasts were identified by culture on chromogenic media chromID<sup>®</sup>Candida agar  
124 (BioMerieux, Marcy l'Étoile, France) combined with carbon assimilation testing using the API<sup>®</sup>ID32C system  
125 (BioMerieux, France). As no API<sup>®</sup> code matches the complex, strains identification was made by matching  
126 profiles with those of an internal database of isolates previously identified by sequencing. Furthermore, carbon  
127 assimilation identification does not distinguish species within the complex, isolates were identified as *C.*  
128 *haemulonii* complex-related yeasts.

129 Since 2017, species identification has been performed routinely by matrix-assisted laser desorption/ionization  
130 time of flight mass spectroscopy (MALDI-TOF MS) using the Biotyper<sup>™</sup> system (Bruker Daltonics,  
131 Billerica, MA, USA). Nine strains isolated before 2017 were rechecked, showing no discrepancy with

132 biochemical analysis (**Table S1**). Nonetheless, since the distinction between *C. haemulonii sensu stricto* and  
133 *C. haemulonii var. vulnera* is currently not possible without sequencing[24,25], such isolates only identified  
134 by MALDI-TOF MS were considered as *C. haemulonii sensu lato* or *C. duobushaemulonii*.

## 135 **Statistical analysis**

136 Analyses were performed on isolates from single episodes of fungemia, each isolate corresponding to a single  
137 patient. Associated factors were studied according to the species. We selected the variables significantly  
138 associated with any of the two groups at the threshold  $p < 0.20$ . We developed an explanatory model using  
139 logistic regression, with a manual stepwise procedure guided by the Akaike Information Criterion.  
140 Explanatory model results were reported as adjusted odds ratios (aOR) with 95% confidence intervals  
141 (95%CI). Data were analyzed using R software (version 4.0.2).

## 142 **Ethics**

143 The fungemia series was carried out in compliance with French law and the declaration of Helsinki (as adopted  
144 in 2000) and was approved by the French Mycoses Study Group scientific council. The surveillance of the  
145 NRCMA was approved by the Institut Pasteur Institutional Review Board #1 (#2009–34/IRB) and the  
146 "Commission Nationale de l'Informatique et des Libertés" according to the French regulation. The study in  
147 Martinique has been approved by the IRB of the Martinique university hospital (#2020/064).

# 148 **Results**

## 149 **Fungemia series**

150 Between October 1<sup>st</sup>, 2002, and July 31<sup>st</sup>, 2021, among the 12 032 candidemia episodes reported in YEASTS  
151 and RESSIF, 28 (0.23%) were caused by *C. haemulonii* complex, *C. pseudohaemulonii*, or *C. vulturna*

152 (Table 1). The incidence appears to increase over time (Fig S1), with 15/28 (53.6%) cases reported between  
 153 2017 and 2021. Notifications from the French West Indies and French Guiana accounted for 71.4% (20/28)  
 154 of all cases.

| Characteristics                                        | <i>C. haemulonii</i> complex-related species | <i>C. parapsilosis</i> |
|--------------------------------------------------------|----------------------------------------------|------------------------|
| Total                                                  | 28                                           | 942                    |
| Hospital (%)                                           |                                              |                        |
| Martinique university hospital (FWI)                   | 10 (35.7)                                    | 62 (6.6)               |
| Cayenne hospital (French Guiana)                       | 9 (32.1)                                     | 6 (0.6)                |
| Guadeloupe university hospital (FWI)                   | 1 (3.6)                                      | 1 (0.1)                |
| Paris aera hospitals                                   | 5 (17.9)                                     | 200 (21.2)             |
| Other hospitals in mainland France                     | 3 (10.7)                                     | 673 (71.4)             |
| Birth continent (%)                                    |                                              |                        |
| Africa                                                 | 1/20 (5.0)                                   | 35/456 (7.6)           |
| America                                                | 18/20 (90.0)                                 | 62/456 (13.5)          |
| Europe                                                 | 1/20 (5.0)                                   | 359/456 (78.2)         |
| Travels during the previous year (%)                   |                                              |                        |
| Africa                                                 | 2/22 (9.1)                                   | 14/216 (6.5)           |
| Latin America                                          | 2/22 (9.1)                                   | 1/216 (0.5)            |
| West Indies                                            | 4/22 (18.2)                                  | 48/216 (22.2)          |
| None                                                   | 14/22 (63.6)                                 | 148/216 (68.5)         |
| Median age in years [IQR]                              | 67 [46-72]                                   | 62 [46-72]             |
| Male (%)                                               | 16 (57.1)                                    | 625 (66.3)             |
| Solid cancer (%)                                       | 8/24 (33.3)                                  | 281 (29.8)             |
| Hematological malignancy (%)                           | 5/26 (19.2)                                  | 118 (12.5)             |
| Chronic kidney failure (%)                             | 3/24 (12.5)                                  | 102 (10.8)             |
| Liver cirrhosis (%)                                    | 1/24 (4.2)                                   | 43 (4.6)               |
| Diabetes mellitus (%)                                  | 3/24 (12.5)                                  | 129 (13.7)             |
| HIV (%)                                                | 2/23 (8.7)                                   | 13/412 (3.2)           |
| Corticosteroids <sup>a</sup> (%)                       | 2 (7.1)                                      | 85 (9.0)               |
| Other immunosuppressive treatment (%)                  | 4 (14.3)                                     | 200 (21.2)             |
| Surgery during the previous month (%)                  | 10/26 (38.5)                                 | 358 (38.0)             |
| Exposure to antifungal agent in the previous month (%) |                                              |                        |
| Amphotericin B                                         | 1/24 (4.2)                                   | 11/916 (1.2)           |
| Echinocandin                                           | 0 (0.0)                                      | 88/916 (9.6)           |
| Fluconazole                                            | 1/24 (4.2)                                   | 9/916 (1.0)            |
| Voriconazole                                           | 2/24 (8.3)                                   | 7/916 (0.8)            |
| Posaconazole                                           | 0 (0.0)                                      | 1/916 (0.1)            |
| Isavuconazole                                          | 0 (0.0)                                      | 5/916 (0.5)            |
| None                                                   | 20/24 (83.3)                                 | 804/916 (87.7)         |
| Central venous catheter (%)                            | 15/22 (68.2)                                 | 693/753 (92.6)         |
| Context of bacterial infection (%)                     | 11/24 (45.8)                                 | 180 (19.1)             |

|                                     |              |                |
|-------------------------------------|--------------|----------------|
| Intensive Care Unit (%)             | 10/26 (38.5) | 315 (33.4)     |
| Shock (%)                           | 3/24 (12.5)  | 52 (5.5)       |
| Species (%)                         |              |                |
| <i>C. haemulonii sensu stricto</i>  | 16 (57.1)    | -              |
| <i>C. duobushaemulonii</i>          | 8 (28.6)     | -              |
| <i>C. vulturna</i>                  | 3 (10.7)     | -              |
| <i>C. pseudohaemulonii</i>          | 1 (3.6)      | -              |
| Antifungal treatment (%)            |              |                |
| Amphotericin B                      | 0/26 (0.0)   | 46/922 (5.0)   |
| Echinocandin                        | 15/26 (58.7) | 472/922 (51.2) |
| Fluconazole                         | 3/26 (11.5)  | 313/922 (33.9) |
| Itraconazole                        | 1/26 (3.8)   | 0/922 (0.0)    |
| Voriconazole                        | 0/26 (0.0)   | 16/922 (1.7)   |
| Posaconazole                        | 0/26 (0.0)   | 3/922 (0.3)    |
| None                                | 7/26 (26.9)  | 86/922 (9.3)   |
| All-cause mortality at 3 months (%) | 11/25 (44.0) | 192/757 (25.4) |
| Median time to death in days [IQR]  | 18 [7-41]    | 8 [2-18]       |

**FWI: French West Indies, IQR: Interquartile Range**

**<sup>a</sup>≥ 0.3mg/kg for ≥ 1 month**

For each case, demographics, underlying conditions, initial antifungal treatment, and 3-month survival status were collected using a standardized questionnaire through a secure website.

**The date of the fungemia corresponded to the date of the first positive blood culture.**

Surgery and antifungal pre-exposure were considered in the 30 days prior to fungemia.

155

156 Subjects were mostly men (16, 57.1%) and the median age was 67 years (Interquartile Range (IQR)=46-72);

157 81.4% of them lived or had stayed in tropical regions. Twenty six patients (92.9%) had at least one of the

158 following comorbidities: solid cancer (8/24, 33.3%), hematological malignancy (5/26, 19.2%), recent surgical

159 procedure (10/26, 38.5%), central venous catheter (15/22, 68.2%), context of bacterial infection (11/24,

160 45.8%), hospitalization in ICU (10/26, 38.5%) ine of them (32.1%) presented at least three of them.

161 Four distinct species were identified. *Candida haemulonii sensu stricto* was the dominant species (16, 57.1%),

162 followed by *C. duobushaemulonii* (8, 28.6%) and *C. vulturna* (3, 10.7%). *C. pseudohaemulonii* was identified

163 once (1, 3.6%), whereas no *C. haemulonii var. vulnera* was retrieved. The distribution of species varied

164 according to age, with a median age of 67 and 70 years for *C. haemulonii* and *C. duobushaemulonii*,

165 respectively, compared with 46 and 27 years for *C. pseudohaemulonii* and *C. vulturna*, respectively.

166 Among the three patients who presented fungemia due to *C. vulturna*, two had a history of cancer and were

167 pre-exposed to voriconazole, and 2 had recent surgery. The only *C. pseudohaemulonii* episode occurred in a

168 46-year-old woman from Brazil who was hospitalized in French Guiana for gastric linitis. She had no bacterial  
169 co-infection or recent surgery.

170 All-cause mortality at 3 months after diagnosis was 44% (11/25), of which 7 (63%) occurred in the first 30  
171 days and 5 (45%) in the first 15 days. Mortality increased with age, from 3 (27.2%) in the <67 age group to  
172 57.1% in the ≥67 age group. Two patients survived despite the absence of antifungal treatment. They were  
173 under 30 years old, had no underlying disease, and benefited from prompt catheter replacement.

174 Antifungal susceptibility testing could be performed on 23/28 strains. The median MIC values for  
175 amphotericin B are high, especially for *C. duobushaemulonii* (2 mg/l). Oppositely, those for fluconazole were  
176 lower for *C. duobushaemulonii*, yet still high (16 mg/l). The median MIC values for micafungin were  
177 ≤0.250 mg/l for all strains (**Figs 1 and S2**).

## 178 **Case-control study**

179 Between 2012 and 2021, 942 episodes of *C. parapsilosis* fungemia in adults were declared within the RESSIF  
180 database (**Table 1**). The geographical location of the patient in overseas territories was significantly associated  
181 with the development of *C. haemulonii* complex-related species fungemia (aOR=70.77, 95%CI=23.67-  
182 280.01), followed by the context of bacterial infection (aOR=2.91, 95%CI=1.10-7.64) (**Fig 2a**).

183 Three-month all-cause mortality was mainly associated with intensive care management and underlying  
184 comorbidities (**Fig 2b**). After adjusting for patient comorbidities, presence of bacterial infections, and level of  
185 care, fatal outcomes tended to be more frequent in *C. haemulonii* complex-related species fungemia than in  
186 *C. parapsilosis* fungemia (aOR=2.39, 95%CI=0.95-5.86).

## 187 **Colonization in Martinique**

188 We identified 119 *C. haemulonii* complex colonizations, in 116 adults with consultable medical records (**Fig**  
189 **S3**). Of the 87 colonizations in outpatients (**Table 2**), 61 (70.1%) were cutaneous and 12 (13.8%) were  
190 ophthalmologic.

**Table 2.** Characteristics of patients with *C. haemulonii* complex colonization in university hospital of Martinique between 2014 and 2020.

| Characteristics                                               | Outpatients <sup>a</sup> | Patients in ICU <sup>b</sup> |
|---------------------------------------------------------------|--------------------------|------------------------------|
| Total of events                                               | 87                       | 17                           |
| Mean age in years (SD)                                        | 57.8 (16.7)              | 62.2 (17.6)                  |
| Male (%)                                                      | 34 (39.1)                | 13 (76.5)                    |
| Birth continent (%)                                           |                          |                              |
| America                                                       | 81 (93.1)                | 15 (88.2)                    |
| Europe                                                        | 6 (6.9)                  | 2 (11.8)                     |
| Residence department (%)                                      |                          |                              |
| Côtes-d'Armor (Mainland France)                               | 1 (1.1)                  | 0 (0.0)                      |
| Guadeloupe (FWI)                                              | 0 (0.0)                  | 2 (11.8)                     |
| Martinique (FWI)                                              | 86 (98.9)                | 15 (88.2)                    |
| Profession (%)                                                |                          |                              |
| Catering                                                      | 3/77 (3.9)               | 0/15 (0.0)                   |
| Construction                                                  | 5/77 (6.5)               | 2/15 (13.3)                  |
| Education                                                     | 5/77 (6.5)               | 0/15 (0.0)                   |
| Farmer                                                        | 1/77 (1.3)               | 1/15 (6.7)                   |
| Gardener                                                      | 0 (0.0)                  | 1/15 (6.7)                   |
| Healthcare                                                    | 14 (18.2)                | 0/15 (0.0)                   |
| Retired                                                       | 24/77 (31.2)             | 2/15 (13.3)                  |
| Unemployed                                                    | 12/77 (15.6)             | 3/15 (20.0)                  |
| Other                                                         | 13/77 (16.8)             | 2/15 (13.3)                  |
| Travels (%)                                                   | 1/57 (1.8)               | 0/13 (0.0)                   |
| Aquatic activity (%)                                          | 2/21 (9.5)               | 0/2 (0.0)                    |
| Gardening (%)                                                 | 6/21 (28.6)              | 1/2 (50.0)                   |
| Mean BMI in Kg/m <sup>2</sup> (SD)                            | 26.79 (7.6)              | 27.4 (8.2)                   |
| Solid cancer (%)                                              | 14 (16.1)                | 1 (5.9)                      |
| Hemopathy (%)                                                 | 4 (4.6)                  | 1 (5.9)                      |
| Solid organ transplant (%)                                    | 2 (2.3)                  | 0 (0.0)                      |
| Diabetes melitus (%)                                          | 21 (24.1)                | 4 (23.5)                     |
| Corticosteroids (%)                                           | 3 (3.4)                  | 2 (11.8)                     |
| Immunosuppressive treatment (%)                               | 9 (10.3)                 | 0 (0.0)                      |
| HIV (%)                                                       | 1 (1.1)                  | 1 (5.9)                      |
| Other immunodepression (%)                                    | 9 (10.3)                 | 1 (5.9)                      |
| Surgery during the previous month (%)                         | 1 (1.1)                  | 4 (23.5)                     |
| Exposure to antifungal agent in the previous month (%)        | 3 (3.4)                  | 6 (35.3)                     |
| Median length of stay in hospital when sampling in days [IQR] | 0.2 (0.5)                | 38.1 (35.7)                  |
| Sampling site (%)                                             |                          |                              |
| Ear, Nose, or Throat                                          | 4 (4.6)                  | 1 (5.9)                      |
| Genital                                                       | 1 (1.1)                  | 0 (0.0)                      |
| Ophthalmologic                                                | 12 (13.8)                | 0 (0.0)                      |
| Respiratory tract                                             | 9 (10.3)                 | 12 (70.6)                    |
| Pus <sup>c</sup>                                              | 0 (0.0)                  | 2 (11.8)                     |
| Skin                                                          | 61 (70.1)                | 1 (5.9)                      |
| Urine                                                         | 0 (0.0)                  | 1 (5.9)                      |
| Species (%) <sup>d</sup>                                      |                          |                              |
| <i>C. duobushaemulonii</i>                                    | 14 (16.1)                | 7 (41.2)                     |
| <i>C. haemulonii sensu lato</i>                               | 33 (37.9)                | 7 (41.2)                     |
| <i>C. haemulonii sensu lato</i> + <i>C. duobushaemulonii</i>  | 7 (8.0)                  | 1 (5.9)                      |
| <i>C. haemulonii</i> complex                                  | 33 (37.9)                | 2 (11.8)                     |

SD: Standard deviation; FWI: French West Indies; IQR: Interquartile Range

<sup>a</sup> Samples collected during ambulatory care (<48 hours of hospitalization)<sup>b</sup> Samples collected in ICU at least 48 hours after admission<sup>c</sup> Superficial swabbing, considered as skin contaminant<sup>d</sup> Identification accuracy depending on the method used (biochemical, MALDI-TOF MS)

191 Outpatients with skin colonization were predominantly women (41/61, 67.2%); the mean age was 61.3 years;  
192 all lived in Martinique and 24.6% (15/61) were unemployed. Their main comorbidities were diabetes mellitus  
193 (12, 19.7%), solid cancer (12, 19.7%), and immune deficiency or immunosuppressive treatment (6, 9.8% and  
194 5, 8.2%), respectively. Species identification within the complex was possible in 68.9% (42/61) of cases: 32  
195 (76.2%) of *C. haemulonii*, 17 (40.4%) of *C. duobushaemulonii*, and 7 (16.6%) harboring both species. Of  
196 note, *C. parapsilosis* was concomitantly identified in 27 (44.3%) of these samples. Three patients presented 2  
197 positive samples more than 1 month apart, but we could not assert that they were the same species.

198 Patients with ophthalmologic colonization were mostly women (7/12, 58.3%); the mean age was 35 years; all  
199 lived in Martinique and presented no comorbidity, except wearing contact lenses (100%). All had keratitis or  
200 corneal abscess due to *Pseudomonas aeruginosa* or *Fusarium solani* complex.

201 The 17 subjects of the ICU group (**Table 2**) were mostly men (13/17, 76.5%), with a mean age of 62.3 years,  
202 living exclusively in the West Indies. The main comorbidities were diabetes mellitus (4, 23.5%), surgery in  
203 the previous month (4, 23.5%), and recent exposure to antifungals (6, 35.3%). The median length of  
204 hospitalization was 15 days. The most represented specimens were isolated from the respiratory tract (12,  
205 70.6%), including 10 (83.3%) performed on intubated patients. *C. haemulonii* and *C. duobushaemulonii* were  
206 equally frequent, and one patient had mixed colonization. Notably, *C. parapsilosis* was also identified in 5  
207 (29.4%) of these samples. Among the 12 patients screened for multi-drug resistant bacteria, 5 (41.6%) were  
208 positive. The crude mortality at 3 months was 47.1%.

## 209 **Literature review**

210 The search yielded 274 fungemia from 14 countries (**Fig 3**), of which 218 were excluded, mainly due to the  
211 lack of individual data (**Fig S4**). Finally, 56 cases were selected; all occurred between 2006 and 2022. Cases  
212 originated mainly from tropical regions (44/56, 78.6%) (**Table S2**). We individualized two age groups:  
213 children (n=19) with a median age of 3.5 years (IQR=0.1-5), and adults (n=13), with a median age of 66 years  
214 (IQR=52-82). There was no gender predominance in adults. As in our fungemia series, *Candida haemulonii*



215 *sensu stricto* was the dominant species. Among adults, the distribution of species varied according to age,  
216 with a median age of 79 years for *C. haemulonii sensu stricto* compared to 56, 49, and 59 years for *C.*  
217 *duobushaemulonii*, *C. haemulonii var. vulnera*, and *C. pseudohaemulonii*, respectively. Age was known for  
218 only one case of *C. vulturna* (83 years).

219 Although previous antifungal exposure was more frequent in the literature than in our series, the susceptibility  
220 profile was similar, with high MIC values for amphotericin B and fluconazole (**Fig S5**). The median MIC  
221 values of amphotericin B were high, notably for *C. pseudohaemulonii* (32 mg/l) *C. vulturna* (8 mg/l), and  
222 *C. duobushaemulonii* (4 mg/l). The median MIC values of fluconazole were high, especially for the *C.*  
223 *haemulonii* complex yeasts (64 mg/l). Micafungin MIC values were 4 mg/l for 3 strains and  $\leq 0.500$  mg/l for  
224 all the others.

225 Among all cases, the crude mortality rate was high (5/12, 41,7%) and comparable to our fungemia series,  
226 although the time to death was not specified in most articles.

## Discussion

We report a large series of fungemia and colonization caused by emerging multiple resistant yeasts of the *C. haemulonii* complex, or very closely related species (i.e., *C. pseudohaemulonii* and *C. vulturna*), and a case-control study with *C. parapsilosis* as reference. We thereby report the first cases of *C. vulturna* fungemia in South America and Europe since its description in South-East Asia in 2016[11]. Considering our series, these rare fungemia are particularly present in tropical regions. Indeed, among centers of the RESSIF and/or the YEASTS programs, only 9 reported *C. haemulonii* complex-related species fungemia; of these, 3 declarative centers were located in tropical regions, accounting for 20/28 (71.4%) of the whole series. Living in the tropics is by far the factor most associated with the occurrence of fungemia due to these yeasts rather than with *C. parapsilosis*.

In our series, 92.9% patients presented risk factors comparable to those of *C. parapsilosis* fungemia, which also corresponds to that observed elsewhere[26]. Contrastingly, pre-exposure to azoles was uncommon in our series (16.6%), although it is usually considered a significant contributor to non-*albicans* candidemia[27,28]. The high rate of central venous catheters (68.2%) and the absence of digestive surgical site infections suggest skin as the portal of entry for *C. haemulonii* complex-related species candidemia. This is also supported by our results on skin colonization and the ability of such pathogens to form biofilms on prosthetic materials[6,7]. The broad antifungal resistance of *C. haemulonii* complex-related species makes them potentially difficult to treat. Although there are no clinical breakpoints or ECOFFs, the particularly high MIC values for amphotericin B, fluconazole, and to a lesser extent other azoles, suggest intrinsic resistance to these antifungals. Correct identification of *C. haemulonii* complex-related species is relevant not only for epidemiological surveillance but has also a direct therapeutic impact, with amphotericin B having a particularly low *in vitro* activity against *C. duobushaemulonii* and *C. pseudohaemulonii* isolates for instance[29]. Unlike some previously published studies[10,15,30], no death appeared to be attributable to treatment failure in our series, even for the 3 patients

250 treated with fluconazole or itraconazole (whose strains had exceptionally low MIC values for fluconazole  
251 ( $\leq 16$  mg/l 

252 All-cause mortality was similar between our series (44%) and the literature review (46%). As already shown  
253 for catheter-related candidemia, rapid control of the cutaneous portal of entry may play a critical role in  
254 preventing death[31,32].

255 In Martinique, and probably also in Latin America and other Caribbean territories, cutaneous colonization by  
256 *C. haemulonii* exists, especially outside the hospital setting. This is in contrast with its sibling species *C. auris*,  
257 which is often presented as a pure nosocomial yeast. The three patients with positive skin specimens sampled  
258 more than one month apart allow us to suspect chronic colonization. In our study, apart from fungemia, no  
259 deep-seated infections were observed. Moreover, the fact that all patients with positive ophthalmologic  
260 samples wore contact lenses and that 10 of the 12 patients with respiratory colonization in ICU were intubated,  
261 suggests colonization of foreign devices 

262 Our study has several limitations. Missing data, especially on the oldest cases, affected our results. We were  
263 notably unable to retrieve the time-to-positivity of blood cultures, the confirmation of systematic catheter  
264 removal, and the time required for sterilization of blood cultures. Moreover, no skin fungal mapping was  
265 reported, precluding confirmation of the skin colonization hypothesis 

266 Nevertheless, according to our study, the presence of yeasts in a blood culture of a patient hospitalized or  
267 coming from a tropical region, especially if presenting a skin effraction, should suggest the diagnosis of  
268 *C. haemulonii* complex-related yeasts fungemia, as for *Candida parapsilosis*. Such a situation requires  
269 management of the infection's portal of entry and reinforces the utility of probabilistic treatment with  
270 echinocandins. Despite the lack of specific clinical trials, there are some *in vitro* and animal data[33] as well  
271 as case reports of treatment failures with azoles or amphotericin B[10,14] that justify the use of echinocandins  
272 as first-line therapy. When rapid identification by MALDI-TOF MS is not available, the particular aspect of  
273 the cultures on chromogenic media might be sufficient to support the diagnosis[34]. This strategy could limit

274 the delay before initiation of appropriate treatment, which is strongly correlated with mortality in  
275 candidemia[31,35]. Horizontal transmission capacity, especially in hospitals, has already been suggested by  
276 outbreaks involving the *C. haemulonii* complex[14,36]. The emergence of these yeasts is also supported at  
277 the genomic level: the characteristics shared by *C. auris* and the *C. haemulonii* complex-related species  
278 (synteny, similar gene family expansions) suggest similarities in the ecology and physiology of these species  
279 and the potential for them to also emerge as dangerous pathogens[37].

280 Historically described as warm sea yeasts[38], the *C. haemulonii* complex-related yeasts were later identified  
281 as saprophytes of tropical aquatic and terrestrial environment[39–41] —for instance, *C. vulturna* has been  
282 isolated from a tropical flower in the Philippines[11]— and as a potential pathogen for some animal  
283 species[9,42]. Some countries have recently reported cases in neonatology, suggesting the presence of these  
284 yeasts in artificial environments. Although we have no evidence in our series for an epidemic event, other  
285 authors have reported a series of clustered cases[14,29], with the same clone of *C. pseudohaemulonii*, raising  
286 the possibility of nosocomial transmission. A scenario of an emerging epidemic clone within these multi-drug  
287 resistant yeast populations is therefore quite credible[29], like the *C. auris* healthcare-associated outbreaks  
288 described since the 2010s. 

## 289 Acknowledgments

290 Members of the French Mycoses Study group who contributed to the data are in alphabetical order of the  
291 cities, all the French microbiologists and mycologists who sent isolates for characterization of unusual  
292 antifungal susceptibility profiles or to contribute to the ongoing surveillance program on the epidemiology of  
293 invasive fungal infections in France (YEASTS and RESSIF programs): N. Brieu (CH Aix); T. Chouaki (CHU  
294 Amiens); J. P. Bouchara, M. Pihet (CHU Angers); S. Bland (CH Annecy); V. Blanc (CH Antibes); S. Branger  
295 (CH Avignon); A. P. Bellanger, L. Millon (CHU Besançon); C. Plassart (CH Beauvais); I. Poilane (hôpital

296 Jean Verdier, Bondy); I. Accoceberry, L. Delhaes, F. Gabriel (CH Bordeaux); A. L. Roux, V. Sivadon-Tardy  
297 (hôpital Ambroise Paré, Boulogne Billancourt); F. Laurent (CH, Bourg en Bresse); S. Legal, E. Moalic, G.  
298 Nevez, D. Quinio (CHU Brest); M. Cariou (CH Bretagne Sud); J. Bonhomme, C. Duhamel (CHU, Caen); B.  
299 Podac (CH, Chalon sur Saône); S. Lechatch (CH, Charleville-Mézières); C. Soler (hôpital d'Instruction des  
300 armées, Clamart); M. Cambon, C. Nourrisson, P. Poirier, D. Pons (CHU, Clermont Ferrand); O. Augereau, I.  
301 Grawey (CH, Colmar); N. Fauchet (CHIC, Créteil); A. Bonnin (CHU, Dijon); P. Cahen, P. Honderlick (CMC,  
302 Foch); N. Desbois, C. Miossec (CHU, Fort de France); J. L. Hermann (hôpital Raymond Poincaré, Garches)  
303 ; M. Cornet, R. Grillot, B. Lebeau, D. Maubon, (CHU, Grenoble); M. Nicolas (CHU, Guadeloupe); D.  
304 Blanchet, J. F. Carod, M. Demar, (CHU, Guyane); A. Angoulvant (hôpital Bicêtre, le Kremlin Bicêtre); C.  
305 Ciupek (CH, Le Mans); A. Gigandon (hôpital Marie Lannelongue, Le Plessis Robinson); B. Bouteille, MF  
306 Durieux (CH Limoges); D. Dupont, F. Persat (CHU, Lyon); C. Cassagne, S.Ranque (CHU, Marseille); T.  
307 Benoit-Cattin, L. Collet (CH Mayotte); A. Fiacre (CH Meaux); N. Bourgeois, L. Lachaud, Y. Sterkers (CHU,  
308 Montpellier); M. Machouart (CHU, Nancy); F. Morio (CHU, Nantes) ; O. Moquet (CH, Nevers) ; S.  
309 Lefrançois (hôpital Américain, Neuilly) ; M. Sasso (CHU, Nimes) ; F. Reibel (GH, Nord-Essone) ; M. Gari-  
310 Toussaint, L. Hasseine (CHU Nice) ; L. Bret, D. Poisson (CHR Orléans) ; S. Brun (hôpital Avicenne, Paris) ;  
311 C. Bonnal, C. Chochillon (hôpital Bichat, Paris) ; A. Paugam (hôpital Cochin, Paris) ; N. Ait-Ammar, F.  
312 Botterel, R. Chouk (CHU Henri Mondor, Paris), M. E. Bougnoux, F. Lanternier, E. Sitterle (hôpital Necker,  
313 Paris), A. Datry, A. Fekkar (hôpital Pitié Salpêtrière, Paris); J.-L. Poirot (hôpital St Antoine, Paris) ; S.  
314 Bretagne, A. Alanio, M. Gits-Muselli, S. Hamane, C. Lacroix (hôpital Saint Louis, Paris) ; S. Bonacorsi, P.  
315 Mariani (hôpital Robert Debré, Paris) ; D. Moissenet (hôpital Trousseau, Paris) ; C. Kauffmann-Lacroix, A.  
316 Minoza, E. Perraud, (CHU Poitiers) ; G. Colonna (CH, Porto Vecchio) ; A. Huguenin, D. Toubas (CHU  
317 Reims), S. Chevrier, J. P. Gangneux, F. Robert-Gangneux (CHU Rennes); O. Belmonte, G. Hoarau, M. C.  
318 Jaffar Bandjee, J. Jaubert, S. Picot, N. Traversier (CHU Réunion); L. Favennec, G. Gargala (CHU, Rouen) ;  
319 N. Godineau, C. Tournus (CH, St Denis) ; C. Mahinc, H. Raberin (CHU, St Etienne) ; V. Letscher Bru (CHU,

320 Strasbourg) ; S. Cassaing (CHU, Toulouse) ; P. Patoz (CH Tourcoing); E. Bailly, J. Chandener, G.  
321 Desoubeaux (CHU Tours) ; F. Moreau (CH Troyes) ; P. Munier (CH Valence) ; E. Mazars (CH Valenciennes)  
322 ; O. Eloy (CH Versailles) ; E. Chachaty (Institut Gustave Roussy, Villejuif); A. Bertho, C. Blanc, A. Boullié,  
323 E. Fruquière, D. Garcia- Hermoso, C. Gautier, V. Geolier, D. Hoinard , D. Raoux-Barbot, and F. Dromer  
324 (NRCMA (Institut Pasteur, Paris).

## 325 **References**

- 326 1. Satoh K, Makimura K, Hasumi Y, Nishiyama Y, Uchida K, Yamaguchi H. *Candida auris* sp. nov., a  
327 novel ascomycetous yeast isolated from the external ear canal of an inpatient in a Japanese hospital.  
328 *Microbiol Immunol.* 2009;53: 41–44.
- 329 2. Chaabane F, Graf A, Jequier L, Coste AT. Review on Antifungal Resistance Mechanisms in the  
330 Emerging Pathogen. *Front Microbiol.* 2019;10: 2788.
- 331 3. Sabino R, Veríssimo C, Pereira ÁA, Antunes F. , an Agent of Hospital-Associated Outbreaks: Which  
332 Challenging Issues Do We Need to Have in Mind? *Microorganisms.* 2020;8.  
333 doi:10.3390/microorganisms8020181
- 334 4. van Schalkwyk E, Mpembe RS, Thomas J, Shuping L, Ismail H, Lowman W, et al. Epidemiologic Shift  
335 in Candidemia Driven by *Candida auris*, South Africa, 2016–2017. *Emerg Infect Dis.* 2019;25: 1698.
- 336 5. WHO fungal priority pathogens list to guide research, development and public health action. World  
337 Health Organization; 25 Oct 2022 [cited 11 Nov 2022]. Available:  
338 <https://www.who.int/publications/i/item/9789240060241>
- 339 6. Ramos LS, Oliveira SSC, Souto XM, Branquinha MH, Santos ALS. Planktonic growth and biofilm  
340 formation profiles in *Candida haemulonii* species complex. *Med Mycol.* 2017;55: 785–789.
- 341 7. Ramos LS, Oliveira SSC, Silva LN, Granato MQ, Gonçalves DS, Frases S, et al. Surface, adhesiveness  
342 and virulence aspects of *Candida haemulonii* species complex. *Med Mycol.* 2020;58: 973–986.
- 343 8. Deng Y, Li S, Bing J, Liao W, Tao L. Phenotypic Switching and Filamentation in *Candida haemulonii*,  
344 an Emerging Opportunistic Pathogen of Humans. *Microbiol Spectr.* 2021;9: e0077921.
- 345 9. Cendejas-Bueno E, Kolecka A, Alastruey-Izquierdo A, Theelen B, Groenewald M, Kostrzewa M, et al.  
346 Reclassification of the *Candida haemulonii* complex as *Candida haemulonii* (*C. haemulonii* group I), *C.*  
347 *duobushaemulonii* sp. nov. (*C. haemulonii* group II), and *C. haemulonii* var. *vulnera* var. nov.: three  
348 multiresistant human pathogenic yeasts. *J Clin Microbiol.* 2012;50: 3641–3651.
- 349 10. Kim M, Shin JH, Sung H, Lee K, Kim E, Ryoo N, et al. *Candida haemulonii* and Closely Related Species

- 350 at 5 University Hospitals in Korea: Identification, Antifungal Susceptibility, and Clinical Features.  
351 *Clinical Infectious Diseases*. 2009. pp. e57–e61. doi:10.1086/597108
- 352 11. Sipiczki M, Tap RM. *Candida vulturna* pro tempore sp. nov., a dimorphic yeast species related to the  
353 *Candida haemulonii* species complex isolated from flowers and clinical sample. *Int J Syst Evol*  
354 *Microbiol*. 2016;66. doi:10.1099/ijsem.0.001302
- 355 12. Lavarde, V., F. Daniel, H. Saez, M. Arnold, and B. Faguer. Peritonite mycosique a *Torulopsis*  
356 *haemulonii*. *Bull Soc Fr Mycol Med*. 1984;13: 173–176.
- 357 13. Marjolet M. *Torulopsis ernobii*, *Torulopsis haemulonii*: levures opportunistes chez l'immunodéprimé?  
358 *Bull Soc Fr Mycol Med*. 1986;15: 143–146.
- 359 14. Khan ZU, Al-Sweih NA, Ahmad S, Al-Kazemi N, Khan S, Joseph L, et al. Outbreak of *Fungemia* among  
360 Neonates Caused by *Candida haemulonii* Resistant to Amphotericin B, Itraconazole, and Fluconazole.  
361 *Journal of Clinical Microbiology*. 2007. pp. 2025–2027. doi:10.1128/jcm.00222-07
- 362 15. Ruan S-Y, Kuo Y-W, Huang C-T, Hsiue H-C, Hsueh P-R. Infections due to *Candida haemulonii*: species  
363 identification, antifungal susceptibility and outcomes. *International Journal of Antimicrobial Agents*.  
364 2010. pp. 85–88. doi:10.1016/j.ijantimicag.2009.08.009
- 365 16. Córdoba S, Vivot W, Bosco-Borgeat ME, Taverna C, Szusz W, Murisengo O, et al. Species distribution  
366 and susceptibility profile of yeasts isolated from blood cultures: results of a multicenter active laboratory-  
367 based surveillance study in Argentina. *Rev Argent Microbiol*. 2011;43. doi:10.1590/S0325-  
368 75412011000300003
- 369 17. Desnos-Ollivier M, Lortholary O, Bretagne S, Dromer F. Azole Susceptibility Profiles of More than  
370 9,000 Clinical Yeast Isolates Belonging to 40 Common and Rare Species. *Antimicrobial Agents and*  
371 *Chemotherapy*. 2021. doi:10.1128/aac.02615-20
- 372 18. Muro MD, de Araújo Motta F, Burger M, de Azevedo Melo AS, Dalla-Costa LM. Echinocandin  
373 Resistance in Two *Candida haemulonii* Isolates from Pediatric Patients. *J Clin Microbiol*. 2012;50: 3783.
- 374 19. Bretagne S, Sitbon K, Desnos-Ollivier M, Garcia-Hermoso D, Letscher-Bru V, Cassaing S, et al. Active  
375 Surveillance Program to Increase Awareness on Invasive Fungal Diseases: the French RESSIF Network  
376 (2012 to 2018). *MBio*. 2022;13: e0092022.
- 377 20. Bretagne S, Renaudat C, Desnos-Ollivier M, Sitbon K, Lortholary O, Dromer F, et al. Predisposing  
378 factors and outcome of uncommon yeast species-related fungaemia based on an exhaustive surveillance  
379 programme (2002–14). *Journal of Antimicrobial Chemotherapy*. 2017. pp. 1784–1793.  
380 doi:10.1093/jac/dkx045
- 381 21. Bretagne S, Desnos-Ollivier M, Sitbon K, Lortholary O, Che D, Dromer F, et al. No Impact of  
382 Fluconazole to Echinocandins Replacement as First-Line Therapy on the Epidemiology of Yeast  
383 *Fungemia* (Hospital-Driven Active Surveillance, 2004-2017, Paris, France). *Front Med*. 2021;8: 641965.
- 384 22. Desnos-Ollivier M, Bretagne S, Boullié A, Gautier C, Dromer F, Lortholary O. Isavuconazole MIC  
385 distribution of 29 yeast species responsible for invasive infections (2015–2017). *Clinical Microbiology*  
386 *and Infection*. 2019. pp. 634.e1–634.e4. doi:10.1016/j.cmi.2019.02.007

- 387 23. Desnos-Ollivier M, Bretagne S, Lortholary O, Dromer F, French Mycoses Study Group. Echinocandins  
388 Susceptibility Patterns of 2,787 Yeast Isolates: Importance of the Thresholds for the Detection of FKS  
389 Mutations. *Antimicrob Agents Chemother.* 2022;66: e0172521.
- 390 24. Grenfell RC, da Silva Junior AR, Del Negro GMB, Munhoz RB, Gimenes VMF, Assis DM, et al.  
391 Identification of *Candida haemulonii* Complex Species: Use of ClinProTools™ to Overcome  
392 Limitations of the Bruker Biotyper™, VITEK MSTM IVD, and VITEK MSTM RUO Databases.  
393 *Frontiers in Microbiology.* 2016. doi:10.3389/fmicb.2016.00940
- 394 25. Isla G, Taverna CG, Szusz W, Vivot W, García-Effron G, Davel G. *Candida haemulonii* sensu lato:  
395 Update of the Determination of Susceptibility Profile in Argentina and Literature Review. *Current Fungal*  
396 *Infection Reports.* 2017. pp. 203–208. doi:10.1007/s12281-017-0300-y
- 397 26. Lortholary O, Renaudat C, Sitbon K, Desnos-Ollivier M, Bretagne S, Dromer F, et al. The risk and  
398 clinical outcome of candidemia depending on underlying malignancy. *Intensive Care Med.* 2017;43:  
399 652–662.
- 400 27. Chow JK, Golan Y, Ruthazer R, Karchmer AW, Carmeli Y, Lichtenberg D, et al. Factors associated with  
401 candidemia caused by non-albicans *Candida* species versus *Candida albicans* in the intensive care unit.  
402 *Clin Infect Dis.* 2008;46: 1206–1213.
- 403 28. Jung DS, Farmakiotis D, Jiang Y, Tarrand JJ, Kontoyiannis DP. Uncommon *Candida* Species Fungemia  
404 among Cancer Patients, Houston, Texas, USA. *Emerging Infectious Diseases.* 2015.  
405 doi:10.3201/eid2111.150404
- 406 29. Gade L, Muñoz JF, Sheth M, Wagner D, Berkow EL, Forsberg K, et al. Understanding the Emergence  
407 of Multidrug-Resistant *Candida*: Using Whole-Genome Sequencing to Describe the Population Structure  
408 of *Candida haemulonii* Species Complex. *Front Genet.* 2020;0. doi:10.3389/fgene.2020.00554
- 409 30. Khan ZU, Al-Sweih NA, Ahmad S, Al-Kazemi N, Khan S, Joseph L, et al. Outbreak of Fungemia among  
410 Neonates Caused by *Candida haemulonii* Resistant to Amphotericin B, Itraconazole, and Fluconazole.  
411 *Journal of Clinical Microbiology.* 2007. pp. 2025–2027. doi:10.1128/jcm.00222-07
- 412 31. Andes DR, Safdar N, Baddley JW, Playford G, Reboli AC, Rex JH, et al. Impact of Treatment Strategy  
413 on Outcomes in Patients with Candidemia and Other Forms of Invasive Candidiasis: A Patient-Level  
414 Quantitative Review of Randomized Trials. *Clinical Infectious Diseases.* 2012. pp. 1110–1122.  
415 doi:10.1093/cid/cis021
- 416 32. Kollef M, Micek S, Hampton N, Doherty JA, Kumar A. Septic shock attributed to *Candida* infection:  
417 importance of empiric therapy and source control. *Clin Infect Dis.* 2012;54: 1739–1746.
- 418 33. Silva LN, Campos-Silva R, Ramos LS, Trentin DS, Macedo AJ, Branquinha MH, et al. Virulence of  
419 *Candida haemulonii* complex in *Galleria mellonella* and efficacy of classical antifungal drugs: a  
420 comparative study with other clinically relevant non-albicans *Candida* species. *FEMS Yeast Res.*  
421 2018;18. doi:10.1093/femsyr/foy082
- 422 34. de Jong AW, Dieleman C, Carbia M, Mohd Tap R, Hagen F. Performance of Two Novel Chromogenic  
423 Media for the Identification of Multidrug-Resistant *Candida auris* Compared with Other Commercially  
424 Available Formulations. *J Clin Microbiol.* 2021;59. doi:10.1128/JCM.03220-20



- 425 35. Garey KW, Rege M, Pai MP, Mingo DE, Suda KJ, Turpin RS, et al. Time to Initiation of Fluconazole  
426 Therapy Impacts Mortality in Patients with Candidemia: A Multi- Institutional Study. *Clinical Infectious*  
427 *Diseases*. 2006. pp. 25–31. doi:10.1086/504810
- 428 36. Ramos R, Caceres DH, Perez M, Garcia N, Castillo W, Santiago E, et al. Emerging Multidrug-Resistant  
429 *Candida duobushaemulonii* Infections in Panama Hospitals: Importance of Laboratory Surveillance and  
430 Accurate Identification. *J Clin Microbiol*. 2018;56. doi:10.1128/JCM.00371-18
- 431 37. Muñoz JF, Gade L, Chow NA, Loparev VN, Juieng P, Berkow EL, et al. Genomic insights into  
432 multidrug-resistance, mating and virulence in *Candida auris* and related emerging species. *Nat Commun*.  
433 2018;9. doi:10.1038/s41467-018-07779-6
- 434 38. None van U, Mc K. *Torulopsis haemulonii* nov. spec., a yeast from the Atlantic Ocean. *Antonie Van*  
435 *Leeuwenhoek*. 1962;28. doi:10.1007/BF02538724
- 436 39. Ferreira N, Belloch C, Querol A, Manzanares P, Vallez S, Santos A. Yeast microflora isolated from  
437 brazilian cassava roots: taxonomical classification based on molecular identification. *Curr Microbiol*.  
438 2010;60. doi:10.1007/s00284-009-9539-z
- 439 40. Pagani DM, Heidrich D, Paulino GVB, de Oliveira Alves K, Dalbem PT, de Oliveira CF, et al.  
440 Susceptibility to antifungal agents and enzymatic activity of *Candida haemulonii* and  
441 *Cutaneotrichosporon dermatis* isolated from soft corals on the Brazilian reefs. *Arch Microbiol*. 2016;198:  
442 963–971.
- 443 41. Tra Bi CY, N'guessan FK, Kouakou CA, Jacques N, Casaregola S, Djè MK. Identification of yeasts  
444 isolated from raffia wine (*Raphia hookeri*) produced in Côte d'Ivoire and genotyping of *Saccharomyces*  
445 *cerevisiae* strains by PCR inter-delta. *World J Microbiol Biotechnol*. 2016;32: 1–9.
- 446 42. Loosová G, Jindrák L, Kopáček P. Mortality caused by experimental infection with the yeast *Candida*  
447 *haemulonii* in the adults of *Ornithodoros moubata* (Acarina: Argasidae). *Folia Parasitol* . 2013;48: 149–  
448 153.

## 449 Supporting information

450 **Table S1. Confirmation of identification by MALDI-TOF MS for strains initially identified *C.***  
451 ***haemulonii* complex by API®ID32C (BioMerieux, Marcy l'Étoile, France) and stored at the**  
452 **University hospital of Martinique**

453 **Fig S1. Bar plot representing the temporal distribution of *C. haemulonii* complex. *C. pseudohaemulonii***  
454 **and *C. vulturna* fungemia (YEASTS and RESSIF databases)**

455 **Fig S2. Susceptibility profiles of our fungemia series strains to antifungal agents by EUCAST broth**  
456 **microdilution reference method.**

457 **Fig S3. Flow chart of the non-blood samples with positive culture for *C. haemulonii* complex yeasts**  
458 **isolated in Martinique university hospital (French West Indies) between 2014 and 2020.** 

- 459 **Fig S4. Flow chart of the reviews cases of *C. haemulonii* complex, *C. pseudohaemulonii* and *C. vulturna***  
460 **fungemia from Medline (1962-2021).**
- 461 **Table S2. Characteristics of patients and strains regarding fungemia found in the literature review with**  
462 **individual data of *C. haemulonii* complex or related yeast fungemia identified by molecular**  
463 **sequencing (MedLine 1962-2022).**
- 464 **Fig S5. Susceptibility profiles of strains from the literature review (MedLine 1962-2022), by**  
465 **microdilution (n=36) or commercial methods (n=16), or not specified (n=1).**
- 466 **File S1. List of the literature review references**

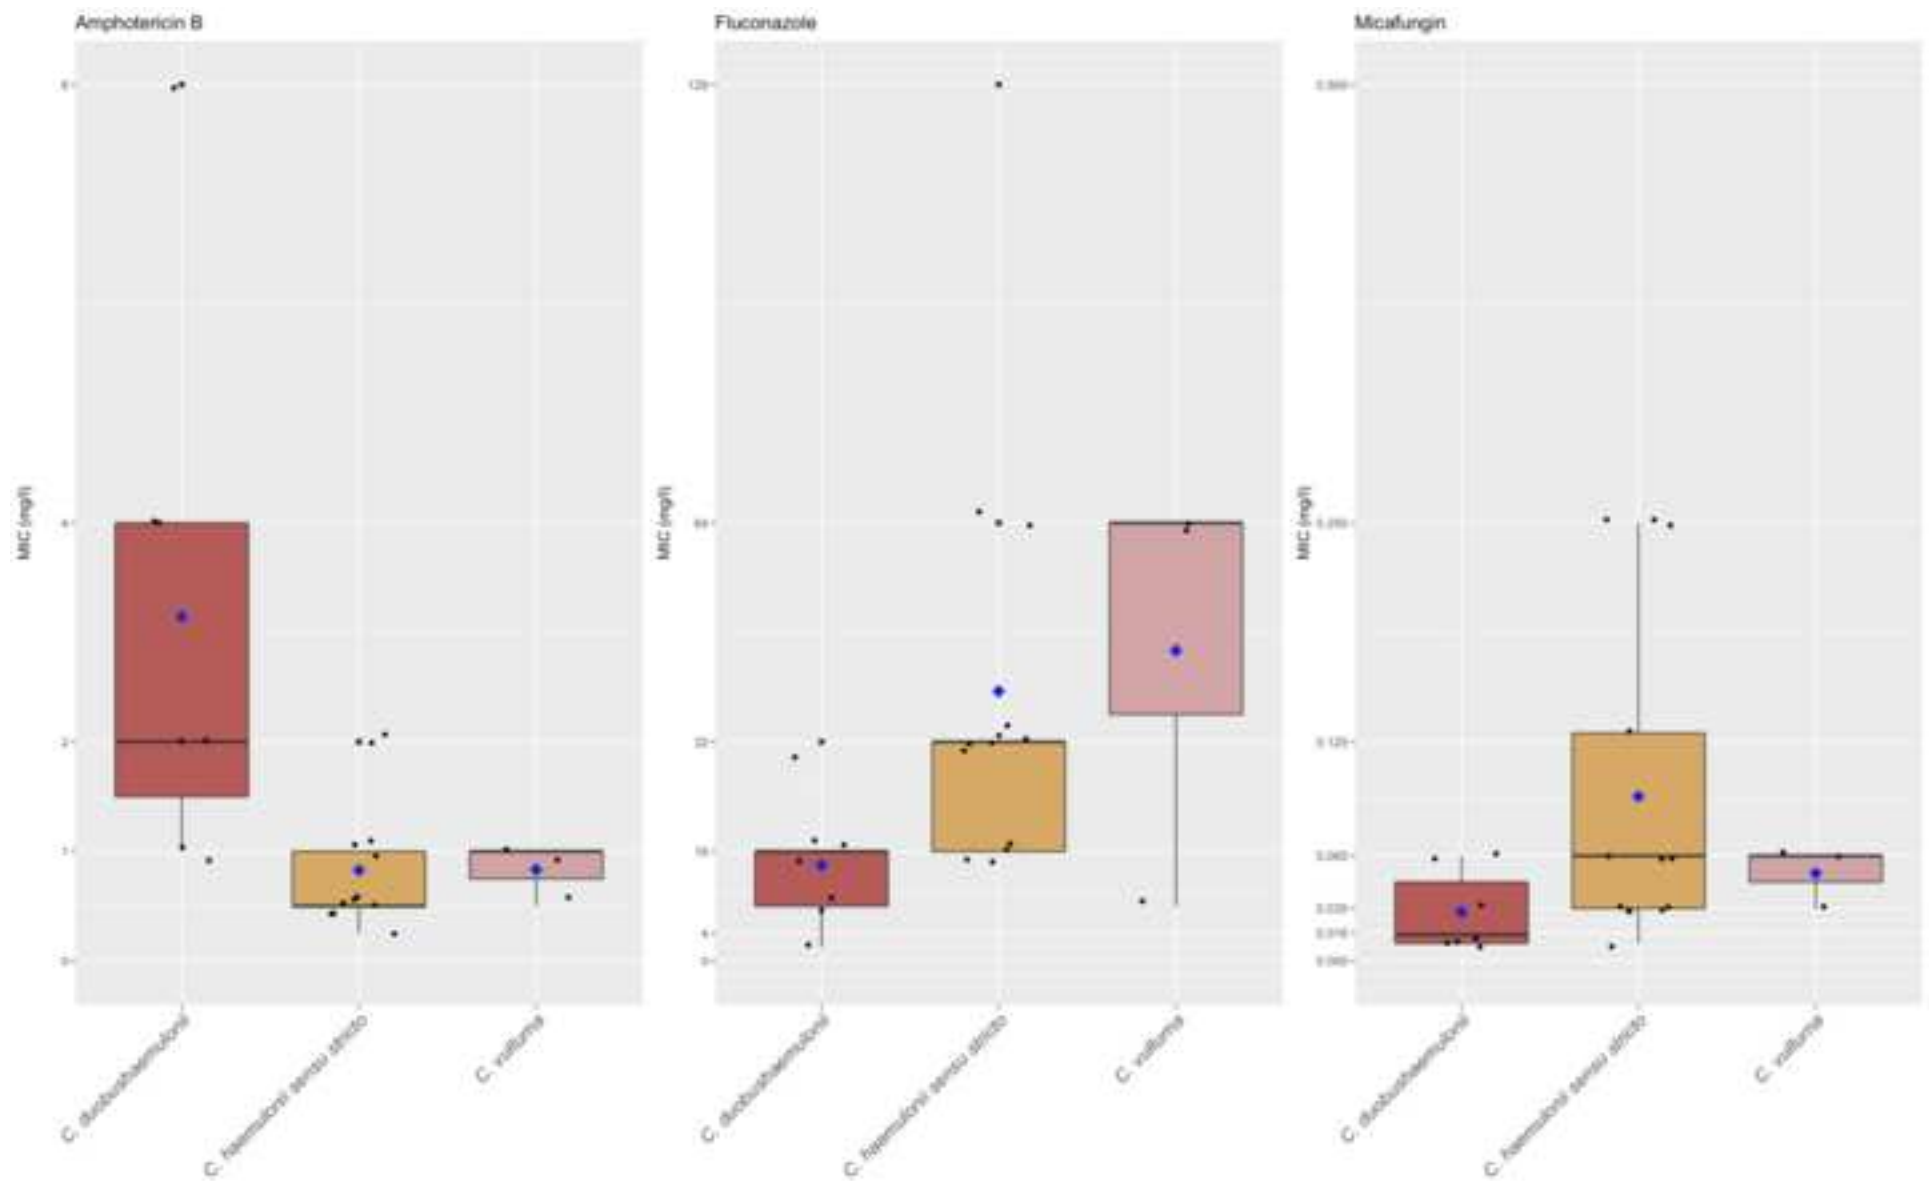

**Figure 1.** Susceptibility profiles of our fungemia series strains to antifungal agents by EUCAST broth microdilution reference method.

*C. duobushaemulonii* = 7, *C. haemulonii sensu stricto* = 13, *C. vulturna* = 3

Bold black bar : median MIC value ; Blue diamond : mean MIC value

| a. Variable                    |                      | N   | Odds ratio            | p      |
|--------------------------------|----------------------|-----|-----------------------|--------|
| Region                         | Mainland France      | 877 | Reference             |        |
|                                | Overseas territories | 88  | 70.77 (23.67, 280.01) | <0.001 |
| Solid cancer                   | No                   | 676 | Reference             |        |
|                                | Yes                  | 289 | 1.91 (0.65, 5.44)     | 0.23   |
| Chronic renal failure          | No                   | 861 | Reference             |        |
|                                | Yes                  | 104 | 1.83 (0.25, 8.79)     | 0.49   |
| Liver cirrhosis                | No                   | 920 | Reference             |        |
|                                | Yes                  | 45  | 6.62 (0.83, 37.97)    | 0.04   |
| Intensive Care Unit            | No                   | 641 | Reference             |        |
|                                | Yes                  | 324 | 1.14 (0.40, 3.18)     | 0.80   |
| Context of bacterial infection | No                   | 774 | Reference             |        |
|                                | Yes                  | 191 | 2.91 (1.10, 7.64)     | 0.03   |

  

| b. Variable                    |                                                  | N   | Odds ratio        | p      |
|--------------------------------|--------------------------------------------------|-----|-------------------|--------|
| Candida species                | <i>C. parapsilosis</i>                           | 757 | Reference         |        |
|                                | <i>C. haemulonii</i> complex and related species | 22  | 2.39 (0.95, 5.86) | 0.057  |
| Solid cancer                   | No                                               | 548 | Reference         |        |
|                                | Yes                                              | 231 | 1.97 (1.34, 2.90) | <0.001 |
| Hemopathy                      | No                                               | 671 | Reference         |        |
|                                | Yes                                              | 108 | 1.92 (1.18, 3.09) | 0.008  |
| Intensive Care Unit            | No                                               | 522 | Reference         |        |
|                                | Yes                                              | 257 | 3.17 (2.23, 4.54) | <0.001 |
| Liver cirrhosis                | No                                               | 742 | Reference         |        |
|                                | Yes                                              | 37  | 0.72 (0.31, 1.56) | 0.432  |
| Context of bacterial infection | No                                               | 628 | Reference         |        |
|                                | Yes                                              | 151 | 1.05 (0.68, 1.59) | 0.837  |

**Figure 2. a.** Explanatory model for the occurrence of *C. haemulonii* complex, *C. pseudohaemulonii* or *C. vulturna* fungemia rather than *C. parapsilosis* (adjusted odds ratio from logistic regression coefficients with 95% confidence interval)

**b.** Explanatory model for the death within 3 months of *C. haemulonii* complex, *C. pseudohaemulonii*, *C. vulturna* or *C. parapsilosis* fungemia. (adjusted odds ratio from logistic regression coefficients with 95% confidence interval)

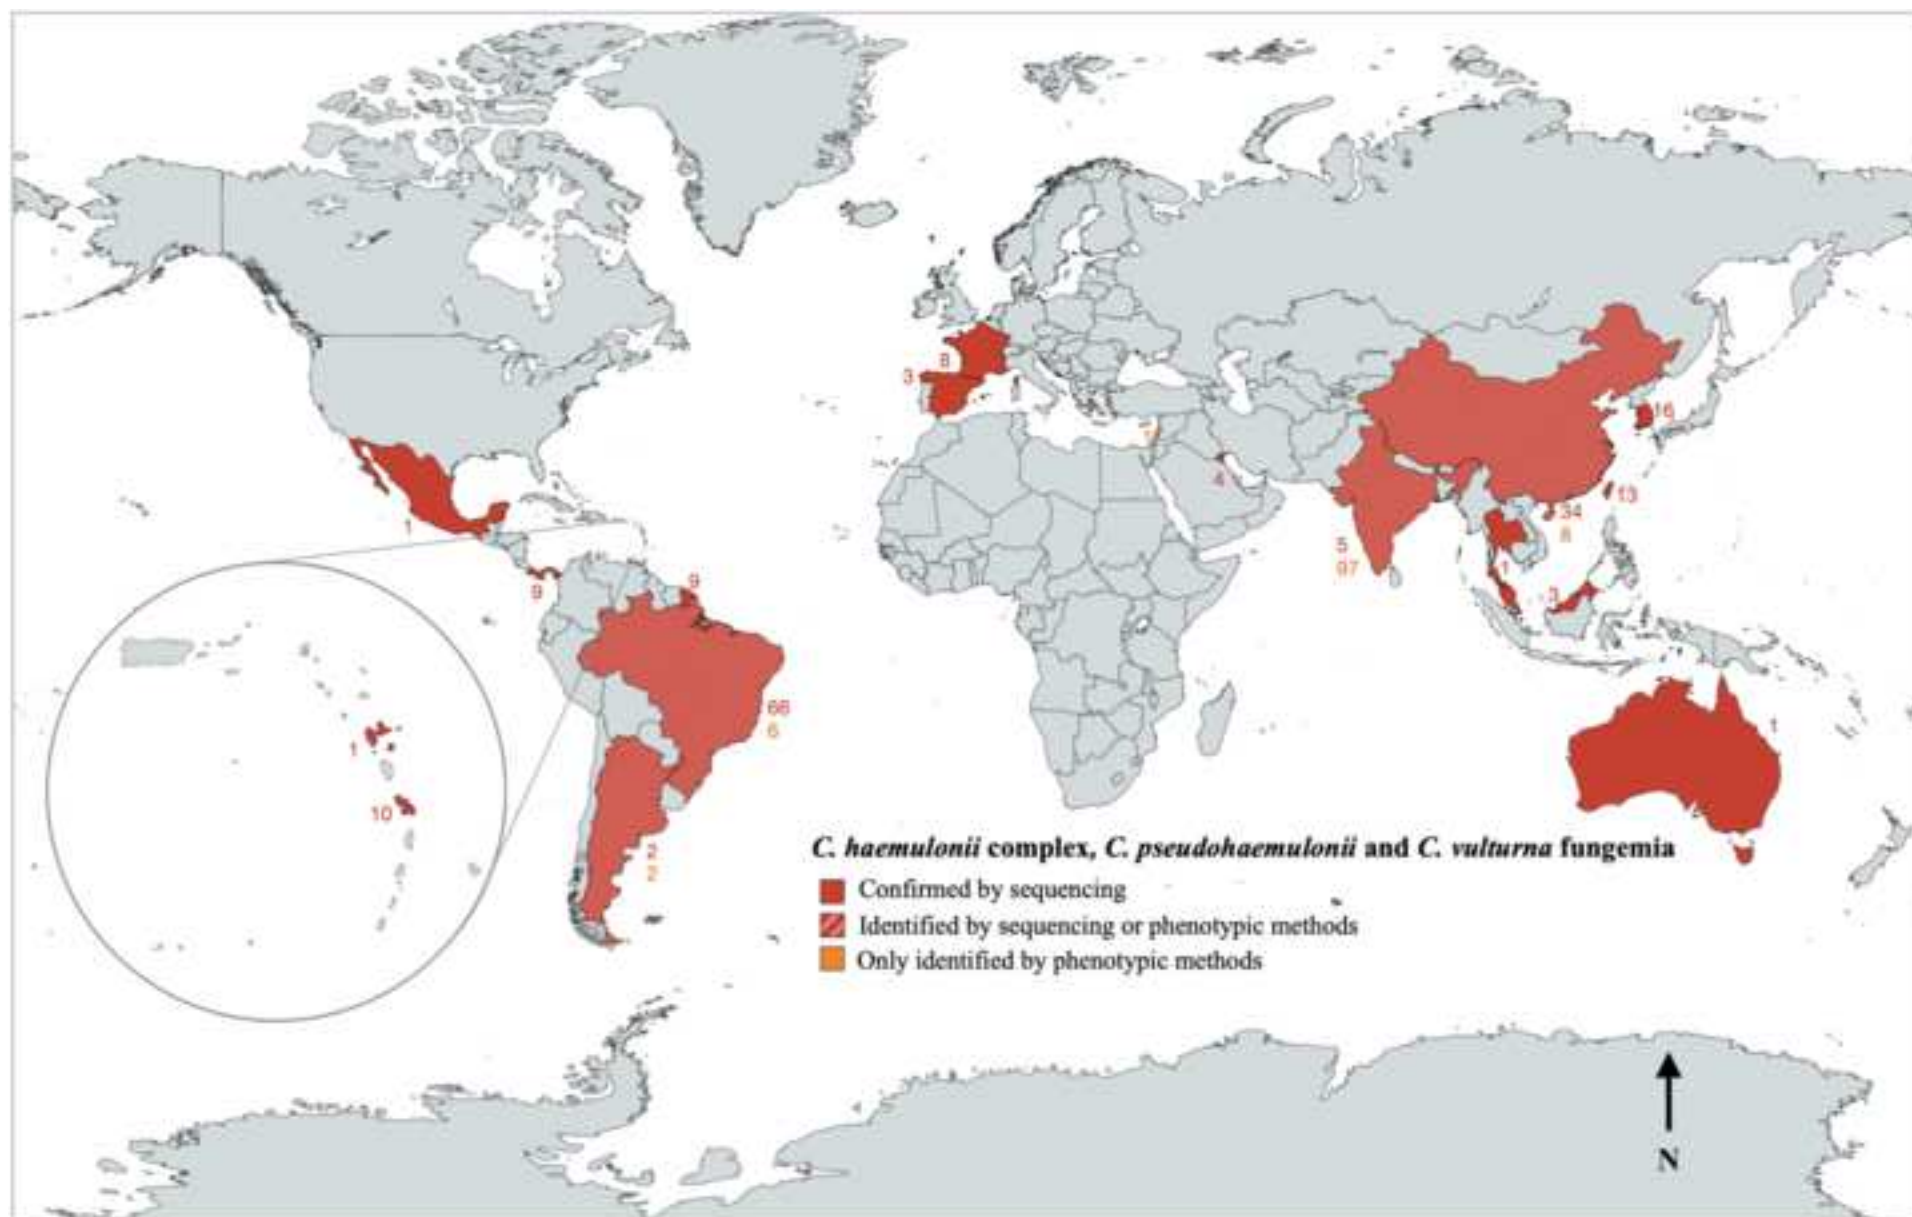

**Figure 3.** World mapping of cases of fungemia due to *C. haemulonii* complex, *C. pseudohaemulonii* or *C. vulturna*, according to our case series (obtained from the YEASTS program 2002-2021 and the RESSIF Network 2012-2021) and the literature review (Medline, 1962-2022). References are in the supplementary materials.

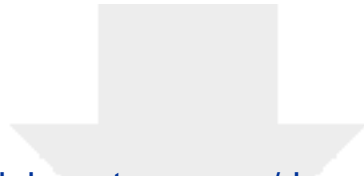

[Click here to access/download](#)

**Supporting Information**

[supplementary materials C. haemulonii PNTD.pdf](#)

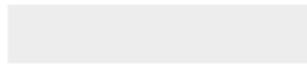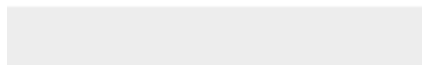

Supplement: pntd.0011453.s008.pdf [file pntd.0011453.s008.pdf]
