# Supplementary material for: Candida haemulonii complex, an emerging threat from tropical regions?
Source: PubMed Central journal article supplement (PMC10437918; doi:10.1371/journal.pntd.0011453), 2023-07-31
Supplement: pntd.0011453.s001.pdf [file pntd.0011453.s001.pdf]

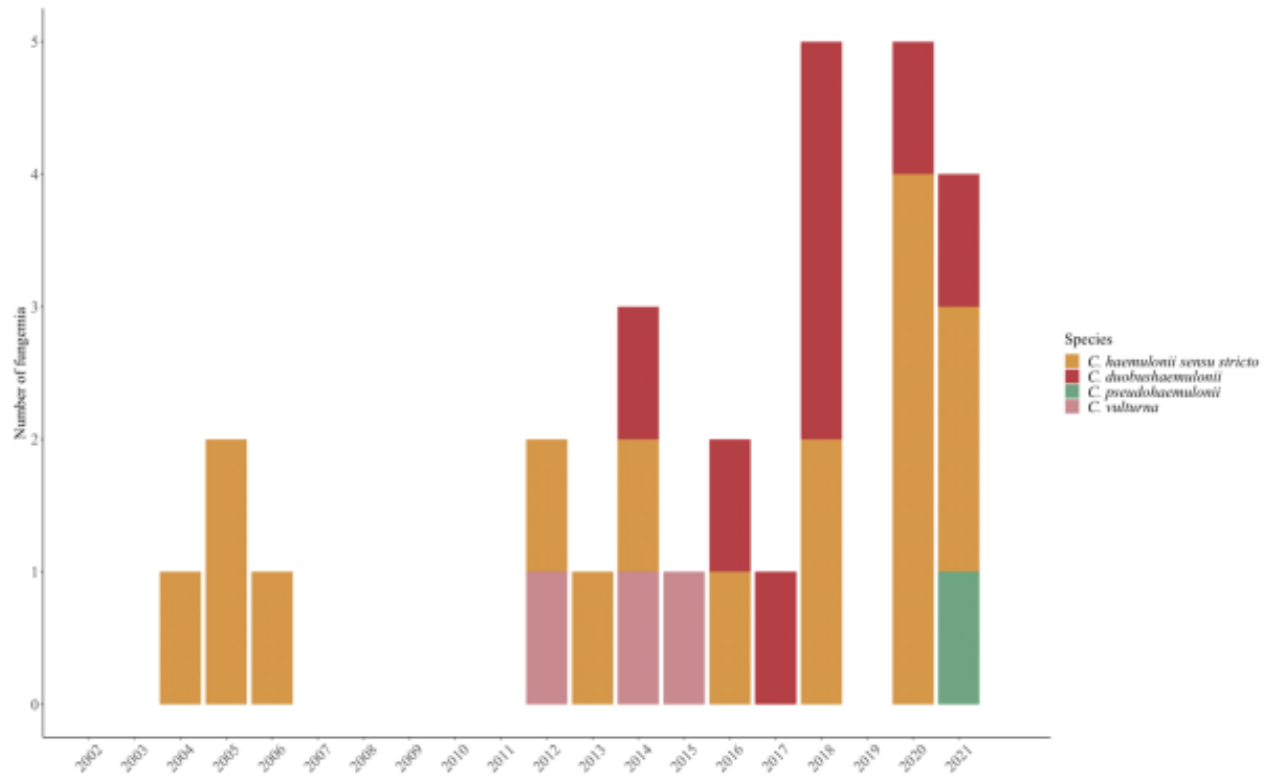

**Figure S1.** Bar plot representing the temporal distribution of *C. haemulonii* complex, *C. pseudohaemulonii* and *C. vulturna* fungemia in France between 2002 and 2021 (YEASTS and RESSIF databases).
