# Supplementary material for: Candida haemulonii complex, an emerging threat from tropical regions?
Source: PubMed Central journal article supplement (PMC10437918; doi:10.1371/journal.pntd.0011453), 2023-07-31
Supplement: pntd.0011453.s002.pdf [file pntd.0011453.s002.pdf]

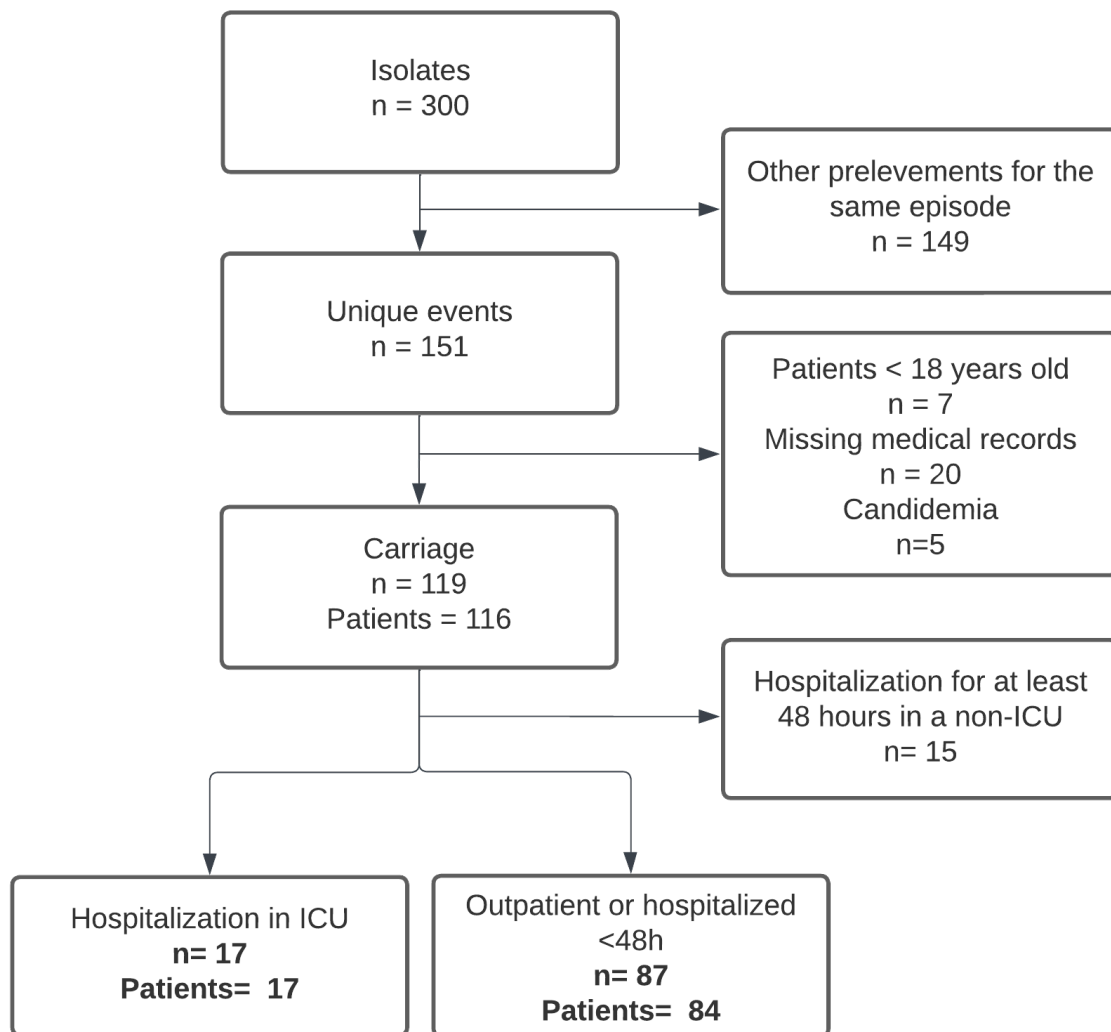

**Figure S2.** Flow chart of the samples with positive culture for *C. haemulonii* complex yeasts considered nonpathogenic, isolated in Martinique University Hospital (French West Indies) between 2014 and 2020.
