# Supplementary material for: Candida haemulonii complex, an emerging threat from tropical regions?
Source: PubMed Central journal article supplement (PMC10437918; doi:10.1371/journal.pntd.0011453), 2023-07-31
Supplement: pntd.0011453.s003.pdf [file pntd.0011453.s003.pdf]

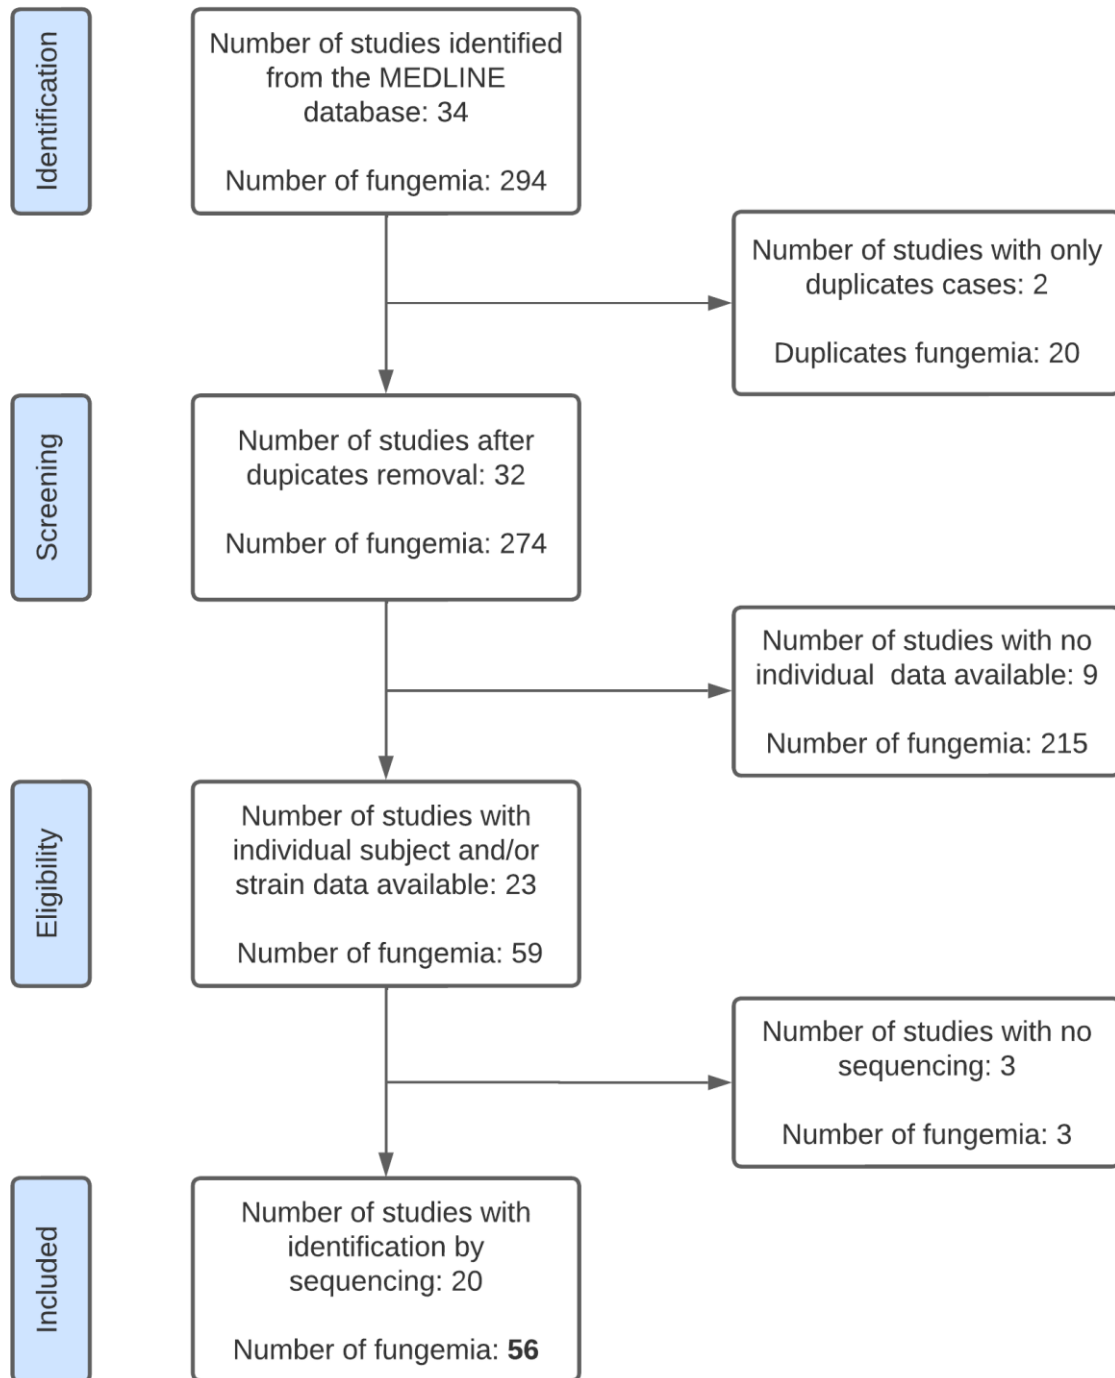

**Figure S3.** Flow chart of the reviewed cases of *C. haemulonii* complex, *C. pseudohaemulonii* and *C. vulturna* fungemia from MedLine (1962-2021).  
References are also in the supplementary materials.
