# Supplementary material for: Candida haemulonii complex, an emerging threat from tropical regions?
Source: PubMed Central journal article supplement (PMC10437918; doi:10.1371/journal.pntd.0011453), 2023-07-31
Supplement: pntd.0011453.s004.pdf [file pntd.0011453.s004.pdf]

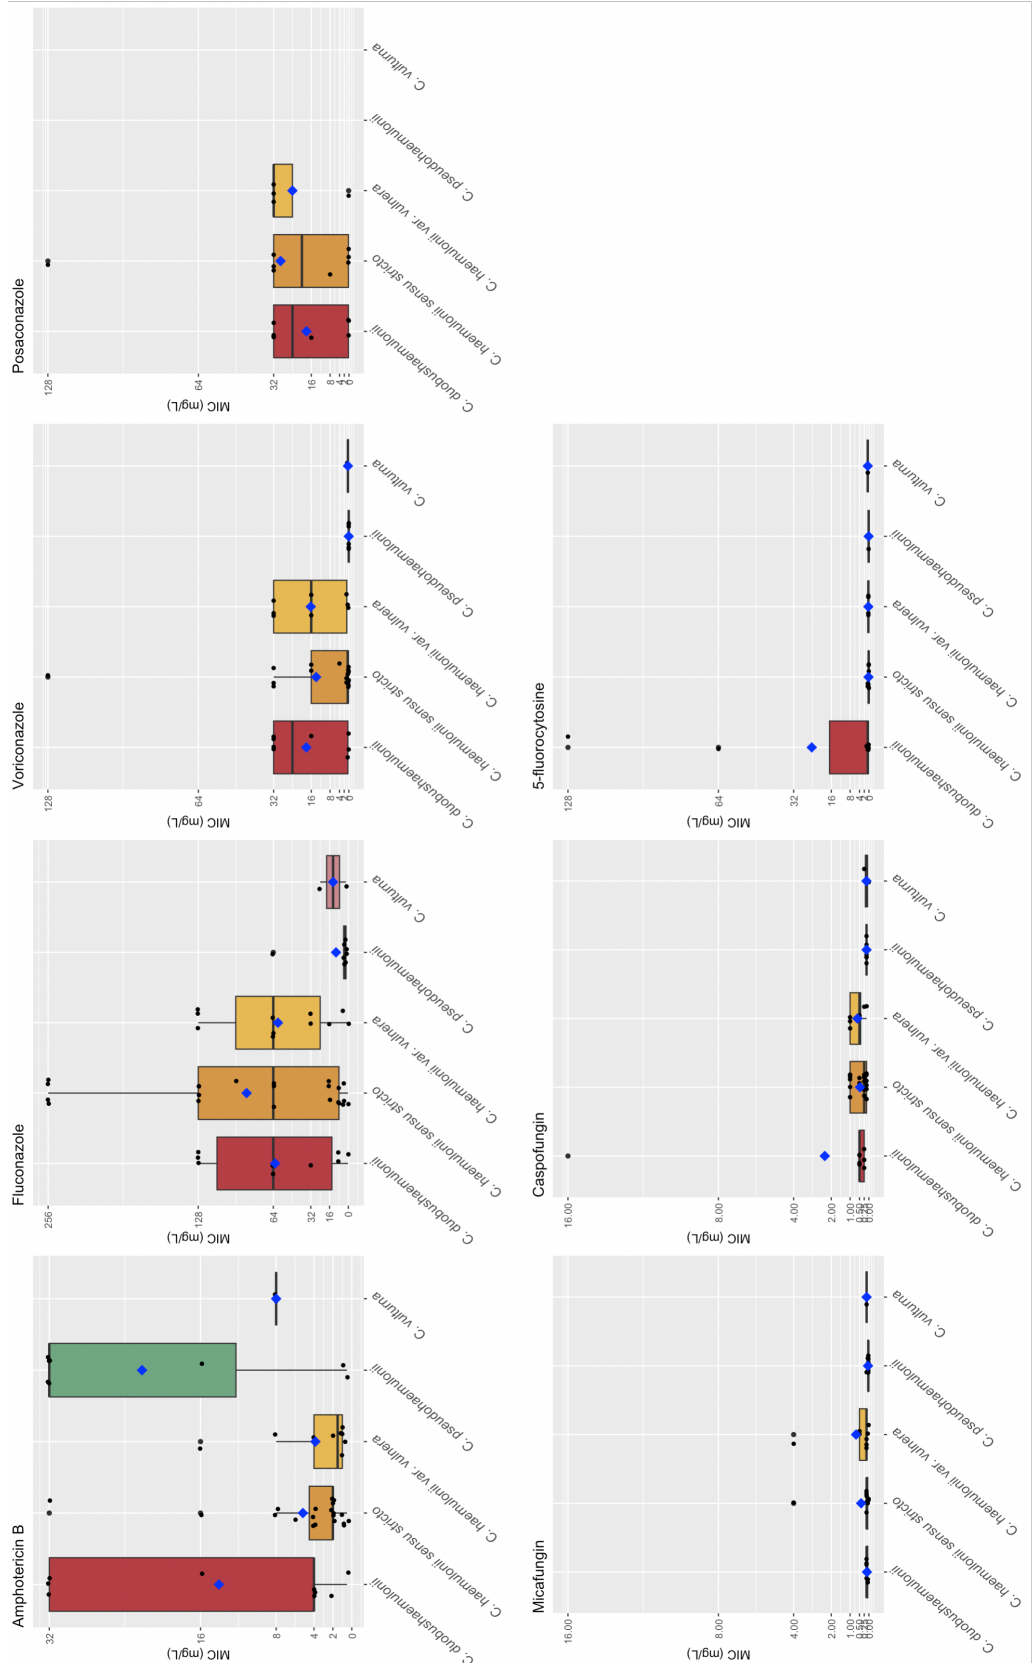

**Figure S4.** Susceptibility profiles of strains from the literature review (MEDLINE 1962-2022, by microdilution (n=36) or commercial methods (n=16), or not specified (n=1)). ***C. dubautshaeemulonii*=10, *C. haemulonii sensu stricto*=22, *C. haemulonii var. vulnerea*=11, *C. pseudohaemulonii*=8, *C. vulturna*=2** Bold black bar: median MIC value, Blue diamond: mean MIC value
