# Supplementary material for: Candida haemulonii complex, an emerging threat from tropical regions?
Source: PubMed Central journal article supplement (PMC10437918; doi:10.1371/journal.pntd.0011453), 2023-07-31
Supplement: pntd.0011453.s005.pdf [file pntd.0011453.s005.pdf]

**Table S1.** Confirmation of identification by MALDI-TOF MS for strains initially identified complex *C. haemulonii* by API®ID32C (BioMerieux, Marcy l'Étoile, France) and stored at the University Hospital of Martinique.

| Date of sampling | First correspondence               | Second correspondence*             | Type of sample |
|------------------|------------------------------------|------------------------------------|----------------|
| 16/09/2014       | <i>C. haemulonii sensu stricto</i> | <i>C. haemulonii var. vulnera</i>  | Respiratory    |
| 14/10/2014       | <i>C. duobushaemulonii</i>         | -                                  | Nail           |
| 26/12/2014       | <i>C. duobushaemulonii</i>         | -                                  | Nail           |
| 24/02/2015       | <i>C. duobushaemulonii</i>         | -                                  | Nail           |
| 25/02/2015       | <i>C. duobushaemulonii</i>         | -                                  | Skin           |
| 24/07/2015       | <i>C. haemulonii var. vulnera</i>  | <i>C. haemulonii sensu stricto</i> | Contact lens   |
| 11/06/2015       | <i>C. haemulonii sensu stricto</i> | <i>C. haemulonii var. vulnera</i>  | Pus            |
| 24/06/2015       | <i>C. haemulonii sensu stricto</i> | <i>C. haemulonii var. vulnera</i>  | Nail           |
| 03/07/2015       | <i>C. haemulonii sensu stricto</i> | <i>C. haemulonii var. vulnera</i>  | Contact lens   |

\*Specified if MS score >1.70
