# Supplementary material for: Candida haemulonii complex, an emerging threat from tropical regions?
Source: PubMed Central journal article supplement (PMC10437918; doi:10.1371/journal.pntd.0011453), 2023-07-31
Supplement: pntd.0011453.s006.pdf [file pntd.0011453.s006.pdf]

**Table S2.** Characteristics of patients and strains regarding fungemia found in the literature review with individual data of *C. haemulonii* complex or related yeast fungemia identified by molecular sequencing (MedLine, 1962-2022).

| Characteristic                                         | Number        |
|--------------------------------------------------------|---------------|
| Total                                                  | 56            |
| Country (%)                                            |               |
| Australia                                              | 1 (2)         |
| Brazil                                                 | 33 (59)       |
| China                                                  | 2 (4)         |
| Kuwait                                                 | 4 (7)         |
| Malaysia                                               | 3 (5)         |
| Mexico                                                 | 1 (2)         |
| South Korea                                            | 9 (16)        |
| Taiwan                                                 | 2 (4)         |
| Thailand                                               | 1 (2)         |
| Median age [IQR]                                       | 10 [0.3-60.0] |
| Median age of the population ≥18-year-old [IQR]        | 66 [52-82]    |
| Male (%)                                               | 17/32 (53)    |
| Solid cancer (%)                                       | 7/32 (22)     |
| Hematological malignancy (%)                           | 5/32 (16)     |
| Kidney failure (%)                                     | 2/30 (7)      |
| Diabetes mellitus (%)                                  | 1/31 (3)      |
| Corticosteroids* (%)                                   | 2/30 (7)      |
| Other immunosuppressive treatment (%)                  | 6/30 (20)     |
| Surgery during the previous month (%)                  | 5/23 (22)     |
| Exposure to antifungal agent in the previous month (%) | 9/31 (29)     |
| Intensive Care Unit (%)                                | 19/24 (79)    |
| Suspected source of fungemia (%)                       |               |
| Skin                                                   | 30/30 (100)   |
| Species (%)                                            |               |
| <i>C. haemulonii sensu stricto</i>                     | 24 (43)       |
| <i>C. duobushaemulonii</i>                             | 10 (18)       |
| <i>C. haemulonii var. vulnera</i>                      | 11 (20)       |
| <i>C. pseudohaemulonii</i>                             | 9 (16)        |
| <i>C. vulturna</i>                                     | 2 (4)         |
| Antifungal treatment (%)                               |               |
| Amphotericin B                                         | 10/31 (32)    |
| Fluconazole                                            | 10/31 (32)    |
| Amphotericin B + Fluconazole                           | 4/31 (13)     |
| Echinocandin                                           | 4/31 (13)     |
| No treatment                                           | 3/31 (10)     |
| All-cause mortality (%)                                | 12/30 (40)    |
| IQR: Interquartile Range                               |               |
| * >0.3 mg/kg/d for ≥ 1 month                           |               |
